# Supplementary material for: Systematic review and meta-analysis on the effects of chronic peri-adolescent cannabinoid exposure on schizophrenia-like behaviour in rodents
Source: Mol Psychiatry. 2024 Aug 2;30(1):285–95. doi: 10.1038/s41380-024-02668-5 (PMC11649573; doi:10.1038/s41380-024-02668-5)
Supplement: Supplementary file 2 — Supplementary Data Collection Sheet [file 41380_2024_2668_MOESM2_ESM.xlsx]

## Sheet: Data extraction table
				Animal information				Intervention																												Risk of bias assessment
Author	Year of Publication	Entry No.		Species	Genotype	Sex		Substance Used	Dose (mg/kg)	Dose range (forTHC )	Duration	Starting week	Frequency (per day)	Route	Control	Note		Test Type	test subtype (if applicable)	Effect type by time	N_Exp group	N_con sample size	N_exp sample size	Primary measure?	Data item1	Value	Data item2	Value	Data item3	Value	Data item4	Value	Data source	Missing data	Note	sequence generation	treatment experimenter	treatment assessor	incomplete outcome addressed
Column1	Column2	Column3		Column1	Column3	Column2		Column1	Column7	Column2	Column3	Column8	Column6	Column4	Column9	Column5			Column1	Column12	Column13	Column2	Column3	Column11	Column4	Column5	Column6	Column7	Column15	Column14	Column17	Column16	Column9	Column8	Column10	Column102	Column103	Column104	Column105
Coleman et al.	2022	1		Mouse	Wildtype	Male		Vaporised cannabis	serum THC 130–150ng/ml		P23-51	4	1	inhaled	Placebo	10.3% THC and 0.05% CBD		Memory Discrimination	Novel object	long-term	1	8	8	No(specify)	Mean_pla	0.66	SE_pla	0.08	mean_exp	0.61	SE_exp	0.17	Text		Investigation ratio, not DI	Unclear	Unclear	Unclear	Yes
Coleman et al.	2022	2		Mouse	Wildtype	Female		Vaporised cannabis			P23-51	4	1	inhaled	Placebo	10.3% THC and 0.05% CBD		Memory Discrimination	Novel object	long-term	1	8	8	No(specify)	Mean_pla	0.75	SE_pla	0.11	mean_exp	0.77	SE_exp	0.18	Graphs		Investigation ratio, not DI	Unclear	Unclear	Unclear	Yes
Gogulski et al.	2022	1		Rat	Wildtype	Male		THC	2.5-5-10	Escalating	P30-43	5	1	s.c.	Vehicle			Open Field	Novelty-induced	long-term	1	26	26	No(specify)	Mean_veh	818.54	SE_veh	68.88	Mean_exp	908.61	SE_exp	71.52	Graphs		beam breaks	Unclear	yes	Yes	Yes
Gogulski et al.	2022	2		Rat	Wildtype	Female		THC	2.5-5-10	Escalating	P30-43	5	1	s.c.	Vehicle			Open Field	Novelty-induced	long-term	1	26	26	No(specify)	Mean_veh	1160.26	SE_veh	63.58	Mean_exp	1041.06	SE_exp	47.68	Graphs		beam breaks	Unclear	yes	Yes	Yes
Ledesma-Corvi et al.	2022	1		Rat	Wildtype	Male		CBD	10		mid-late adolescence	5	1	i.p.	Vehicle			Sucrose Preference		short-term	1	9	3	Yes	Mean_veh	95.24	SE_veh	1.19	Mean_exp	96.43	SE_exp	0.58	Graphs			Yes	Unclear	Yes	Yes
Ledesma-Corvi et al.	2022	2		Rat	Wildtype	Female		CBD	10		mid-late adolescence	5	1	i.p.	Vehicle			Sucrose Preference		short-term	1	8	2	Yes	Mean_veh	95.24	SE_veh	1.19	Mean_exp	89.88	SE_exp	2.38	Graphs			Yes	Unclear	Yes	Yes
Le et al.	2022	1		Rat	Wildtype	Male		THC	5	Middle	P30-43	5	1	i.p.	Vehicle			Memory Discrimination	Novel odour	long-term	1	8	8	No(specify)	Mean_veh	63.35	SE_veh	1.71	Mean_exp	65.06	SE_exp	3.41	Text		Investigation ratio, not DI	Unclear	Unclear	Unclear	Yes
Le et al.	2022	2		Rat	Wildtype	Female		THC	5	Middle	P30-43	5	1	i.p.	Vehicle			Memory Discrimination	Novel odour	long-term	1	8	6	No(specify)	Mean_veh	61.65	SE_veh	2.27	Mean_exp	67.33	SE_exp	1.7	Text		Investigation ratio, not DI	Unclear	Unclear	Unclear	Yes
Le et al.	2022	3		Rat	Wildtype	Male		THC	5	Middle	P30-43	5	1	i.p.	Vehicle			Memory Discrimination	Novel object location	long-term	1	14	15	Yes	t_DI	2.58							Text			Unclear	Unclear	Unclear	Yes
Le et al.	2022	4		Rat	Wildtype	Female		THC	5	Middle	P30-43	5	1	i.p.	Vehicle			Memory Discrimination	Novel object location	long-term	1	12	10	Yes	t_DI	2.58							Text			Unclear	Unclear	Unclear	Yes
Le et al.	2022	5		Mouse	Wildtype	Male		THC	5	Middle	P30-43	5	1	i.p.	Vehicle			Memory Discrimination	Novel odour	long-term	1	12	12	No(specify)	Mean_veh	62.34	SE_veh	3.5	Mean_exp	67.58	SE_exp	2.99	Text		Investigation ratio, not DI	Unclear	Unclear	Unclear	Yes
Le et al.	2022	6		Mouse	Wildtype	Female		THC	5	Middle	P30-43	5	1	i.p.	Vehicle			Memory Discrimination	Novel odour	long-term	1	13	12	No(specify)	Mean_veh	64.09	SE_veh	3.49	Mean_exp	66.58	SE_exp	4.99	Text		Investigation ratio, not DI	Unclear	Unclear	Unclear	Yes
Le et al.	2022	7		Mouse	Wildtype	Male		THC	5	Middle	P30-43	5	1	i.p.	Vehicle			Memory Discrimination	Novel object location	long-term	1	12	12	Yes	t_DI	1.51							Text			Unclear	Unclear	Unclear	Yes
Le et al.	2022	8		Mouse	Wildtype	Female		THC	5	Middle	P30-43	5	1	i.p.	Vehicle			Memory Discrimination	Novel object location	long-term	1	9	9	Yes	t_DI	3.06							Text			Unclear	Unclear	Unclear	Yes
Stollenwerk et al.	2021	1		Mouse	Wildtype	Male		THC	3	Middle	P35-39	5	SA	oral	Vehicle			Open Field	Psychostimulant-induced	long-term	1	9	9	Yes	Mean_veh	188.62	SE_veh	28.75	Mean_exp	129.34	SE_exp	28.74	Graphs			Unclear	Unclear	Unclear	Yes
Stollenwerk et al.	2021	2		Mouse	Wildtype	Male		THC	3	Middle	P35-39	5	SA	oral	Vehicle			Open Field	Novelty-induced	long-term	1	9	9	Yes	Mean_veh	95.88	SE_veh	4.54	Mean_exp	100.43	SE_exp	5.67	Graphs		graph from supplementary	Unclear	Unclear	Unclear	Yes
Stollenwerk et al.	2021	3		Mouse	Wildtype	Male		THC	3	Middle	P35-39	5	SA	oral	Vehicle			Prepulse Inhibition		long-term	1	8-10	8-10	Yes	Mean_veh	26.96	SE_veh	5.29	Mean_exp	42.58	SE_exp	3.48	Graphs			Unclear	Unclear	Unclear	Yes
Stollenwerk et al.	2021	4		Mouse	Wildtype	Male		THC	3	Middle	P35-39	5	SA	oral	Vehicle			Morris Water		long-term	1	7	7	No(specify)										No latency data on probe day		Unclear	Unclear	Unclear	Yes
Stollenwerk et al.	2021	5		Mouse	Wildtype	Male		THC	3	Middle	P35-39	5	SA	oral	Vehicle			Fear Conditioning		long-term	1	8-10	8-10	Yes										No data on probe day		Unclear	Unclear	Unclear	Yes
Stollenwerk et al.	2021	6		Mouse	Wildtype	Female		THC	3	Middle	P35-39	5	SA	oral	Vehicle			Open Field	Psychostimulant-induced	long-term	1	8	8	Yes	Mean_veh	208.6	SE_veh	43.01	Mean_exp	176.34	SE_exp	19.36	Graphs			Unclear	Unclear	Unclear	Yes
Stollenwerk et al.	2021	7		Mouse	Wildtype	Female		THC	3	Middle	P35-39	5	SA	oral	Vehicle			Open Field	Novelty-induced	long-term	1	8	9	Yes	Mean_veh	115.18	SE_veh	11.34	Mean_exp	109.5	SE_exp	9.08	Graphs		graph from supplementary	Unclear	Unclear	Unclear	Yes
Stollenwerk et al.	2021	8		Mouse	Wildtype	Female		THC	3	Middle	P35-39	5	SA	oral	Vehicle			Prepulse Inhibition		long-term	1	8-10	8-10	Yes	Mean_veh	32.9	SE_veh	5.03	Mean_exp	23.22	SE_exp	7.61	Graphs			Unclear	Unclear	Unclear	Yes
Stollenwerk et al.	2021	9		Mouse	Wildtype	Female		THC	3	Middle	P35-39	5	SA	oral	Vehicle			Morris Water		long-term	1	7	8	No(specify)											No latency data on probe day	Unclear	Unclear	Unclear	Yes
Stollenwerk et al.	2021	10		Mouse	Wildtype	Female		THC	3	Middle	P35-39	5	SA	oral	Vehicle			Fear Conditioning		long-term	1	8-10	8-10	No(specify)									Graphs		No data on probe day	Unclear	Unclear	Unclear	Yes
Garzón M et al.	2021	1		Mouse	Wildtype	Male		THC	2.5-5-10	Escalating	P28-43	4	1	i.p.	Vehicle			Memory Alternation	Y maze	long-term	1	5	8	Yes	Mean_veh	16.67	Mean_exp	30.1					Text			Yes	Unclear	Unclear	Unclear
Tagne A et al.	2021	1		Mouse	Wildtype	Male		THC	5	Middle	P30-43	5	1	i.p.	Vehicle			Social Interaction	Social motivation	long-term	1	19	20	Yes	Mean±SE_V-Obj	206.39±58.97	Mean±SE_V-Ani	102.21±24.57	Mean±SE_E-Obj	121.87±47.17	Mean±SE_E-Ani	195.58±53.07	Graphs			Unclear	Unclear	Yes	Unclear
Gobira et al.	2021	1		Mouse	Wildtype	Male		WIN55,212–2	3		P28-49	4	1/3	i.p.	Vehicle			Open Field	Novelty-induced	long-term	1	8	8	Yes	Mean_veh	6.15	SE_veh	1.77	Mean_exp	4.69	SE_exp	0.93	Graphs		unit: m	Yes	Unclear	Yes	Yes
Gobira et al.	2021	2		Mouse	Wildtype	Male		WIN55,212–2	3		P28-49	4	1/3	i.p.	Vehicle			Open Field	Psychostimulant-induced	long-term	1	8	8	Yes	Mean_veh	9.46	SE_veh	2.08	Mean_exp	7.38	SE_exp	0.93	Graphs		unit: m	Yes	Unclear	Yes	Yes
Gobira et al.	2021	3		Mouse	Wildtype	Male		WIN55,212–2	3		P28-49	4	1/3	i.p.	Vehicle			Memory Discrimination	Novel object	long-term	1	8	8	Yes	t_DI	0.5	df	15					Text			Yes	Unclear	Yes	Yes
Smiley et al.	2021	1		Rat	Wildtype	Male		THC+CBD	150µl T:C=10:1		P45-50	7	4	inhaled	Other	concentration unknown; control: Air		Fear Conditioning		long-term	1	12-16	12-16	Yes	Mean_air	50.57	SE_air	4.56	Mean_exp	71.86	SE_exp	4.19	Graphs		unit: average %	Unclear	Unclear	Unclear	Unclear
Sabran-Cohen et al	2021	1		Rat	Wildtype	Male		THC	2.5-5-10	Escalating	P30-41	5	1	i.p.	Vehicle			Open Field	Novelty-induced	long-term	1	8	9	Yes	Mean_veh	2286.53	SE_veh	292.26	Mean_exp	2303.72	SE_exp	171.92	Graphs		unit:cm	Unclear	Unclear	Yes	Unclear
Sabran-Cohen et al	2021	2		Rat	Wildtype	Male		THC	2.5-5-10	Escalating	P30-41	5	1	i.p.	Vehicle			Memory Discrimination	Novel object	long-term	2	8	9	No(specify)	Mean_veh	0.6075	SE_veh	0.0134	Mean_exp	0.4731	SE_exp	0.0296	Graphs		Investigation ratio (fam as numerator), not DI	Unclear	Unclear	Yes	Unclear
Sabran-Cohen et al	2021	3		Rat	Wildtype	Male		THC	2.5-5-10	Escalating	P30-41	5	1	i.p.	Vehicle			Memory Discrimination	Novel object location	long-term	2	8	9	No(specify)	Mean_veh	0.4872	SE_veh	0.0699	Mean_exp	0.3823	SE_exp	0.0676	Graphs		Investigation ratio (fam as numerator), not DI	Unclear	Unclear	Yes	Unclear
Sabran-Cohen et al	2021	4		Rat	Wildtype	Male		THC	2.5-5-10	Escalating	P45-56	7	1	i.p.	Vehicle			Open Field	Novelty-induced	long-term	1	8	9	Yes	Mean_veh	3558.74	SE_veh	361.03	Mean_exp	3644.7	SE_exp	343.84	Graphs		unit:cm	Unclear	Unclear	Yes	Unclear
Sabran-Cohen et al	2021	5		Rat	Wildtype	Male		THC	2.5-5-10	Escalating	P45-56	5	1	i.p.	Vehicle			Memory Discrimination	Novel object	long-term	2	8	9	No(specify)	Mean_veh	0.629	SE_veh	0.0404	Mean_exp	0.62	SE_exp	0.04	Graphs		Investigation ratio (fam as numerator), not DI	Unclear	Unclear	Yes	Unclear
Sabran-Cohen et al	2021	6		Rat	Wildtype	Male		THC	2.5-5-10	Escalating	P45-56	7	1	i.p.	Vehicle			Memory Discrimination	Novel object location	long-term	2	8	9	No(specify)	Mean_veh	0.4662	SE_veh	0.0816	Mean_exp	0.6224	SE_exp	0.0536	Graphs		Investigation ratio (fam as numerator), not DI	Unclear	Unclear	Yes	Unclear
García-Baos et al.	2021	1		Mouse	Wildtype	Both		CBD	20		P25-34	4	1	i.p.	Vehicle			Memory Discrimination	Novel object	long-term	2	11	15	Yes	Mean_veh	0.3076	SE_veh	0.0518	Mean_exp	0.265	SE_exp	0.0304	Graphs			Yes	yes	Yes	Unclear
García-Baos et al.	2021	2		Mouse	Wildtype	Both		CBD	20		P25-34	4	1	i.p.	Vehicle			Memory Discrimination	Novel object location	long-term	2	11	14	Yes	Mean_veh	0.2193	SE_veh	0.0548	Mean_exp	0.1371	SE_exp	0.0503	Graphs			Yes	yes	Yes	Unclear
García-Baos et al.	2021	3		Mouse	Wildtype	Both		CBD	20		P25-34	4	1	i.p.	Vehicle			Memory Alternation	Y maze	long-term	1	11	14	No(specify)	Mean_veh	77.69	SE_veh	2.28	Mean_exp	71.49	SE_exp	2.89	Graphs		Delayed % correct spontaneous alternation	Yes	yes	Yes	Unclear
Kaplan et al.	2021	1		Mouse	Wildtype	Both		CBD	20		P25-45	4	2	i.p.	Vehicle			Barnes Maze		long-term	1	13	13	Yes	Mean_veh	18.06	SE_veh	3.98	Mean_exp	21.83	SE_exp	9.46	Graphs			Unclear	yes	Yes	Yes
Kaplan et al.	2021	2		Mouse	Wildtype	Both		CBD	20		P25-45	4	2	i.p.	Vehicle			Open Field	Novelty-induced	long-term	1	13	13	Yes	Mean_veh	4440	SE_veh	204	Mean_exp	4084	SE_exp	153	Text		unit:cm	Unclear	yes	Yes	Yes
Gabaglio et al.	2021	1		Rat	Wildtype	Female		THC	2.5-5-10	Escalating	P35-45	5	2	i.p.	Vehicle			Memory Discrimination	Novel object	long-term	3	6	6	Yes	Mean_veh	0.5524	SE_veh	0.0614	Mean_exp	0.0566	SE_exp	0.0172	Graphs			Unclear	yes	Yes	Yes
Gabaglio et al.	2021	2		Rat	Wildtype	Female		THC+CBD	T:2.5-5-10 C:0.83-1.66-3.32	Escalating	P35-45	5	2	i.p.	Vehicle			Memory Discrimination	Novel object	long-term	3	6	6	Yes	Mean_veh	0.5524	SE_veh	0.0614	Mean_exp	0.0841	SE_exp	0.0242	Graphs			Unclear	yes	Yes	Yes
Gabaglio et al.	2021	3		Rat	Wildtype	Female		THC+CBD	T:0.15, C:5	Low	P35-45	5	2	i.p.	Vehicle			Memory Discrimination	Novel object	long-term	3	6	6	Yes	Mean_veh	0.5524	SE_veh	0.0614	Mean_exp	0.1641	SE_exp	0.0614	Graphs			Unclear	yes	Yes	Yes
Gabaglio et al.	2021	4		Rat	Wildtype	Female		THC	2.5-5-10	Escalating	P35-45	5	2	i.p.	Vehicle			Memory Discrimination	Novel object	long-term	4	4	4	Yes	Mean_veh	58.12	SE_veh	14.36	Mean_exp	1.23	SE_exp	1.23	Graphs			Unclear	yes	Yes	Yes
Gabaglio et al.	2021	5		Rat	Wildtype	Female		THC+CBD	T:2.5-5-10 C:0.83-1.66-3.32	Escalating	P35-45	5	2	i.p.	Vehicle			Memory Discrimination	Novel object	long-term	4	4	4	Yes	Mean_veh	58.12	SE_veh	14.36	Mean_exp	9.98	SE_exp	3.08	Graphs			Unclear	yes	Yes	Yes
Gabaglio et al.	2021	6		Rat	Wildtype	Female		THC+CBD	T:0.15, C:5	Low	P35-45	5	2	i.p.	Vehicle			Memory Discrimination	Novel object	long-term	4	4	4	Yes	Mean_veh	58.12	SE_veh	14.36	Mean_exp	13.68	SE_exp	4.92	Graphs			Unclear	yes	Yes	Yes
Gabaglio et al.	2021	7		Rat	Wildtype	Female		CBD	5		P35-45	5	2	i.p.	Vehicle			Memory Discrimination	Novel object	long-term	4	4	4	Yes	Mean_veh	58.12	SE_veh	14.36	Mean_exp	25.44	SE_exp	8.2	Graphs			Unclear	yes	Yes	Yes
Hernandez et al.	2021	1		Rat	Wildtype	Male		cannabis smoke (5.6% THC, 0% cannabidiol (CBD), and 0.4% cannabinol (CBN))	1h, total suspended particles 250mg/m3		P29-49	5	1	inhaled	Placebo			Set Shifting		long-term	1	12	12	Yes	Mean_veh	89.37	SE_veh	13.59	Mean_exp	70.04	SE_exp	13.6	Graphs			Yes	Unclear	Yes	Yes
Hernandez et al.	2021	2		Rat	Wildtype	Male		cannabis smoke (5.6% THC, 0% cannabidiol (CBD), and 0.4% cannabinol (CBN))	1h, total suspended particles 250mg/m3		P29-49	5	1	inhaled	Placebo			Open Field	Novelty-induced	long-term	1	12	12	Yes	Mean_veh	3523.1	SE_veh	162.7	Mean_exp	3811.1	SE_exp	131.8	Text			Yes	Unclear	Yes	Yes
Lemolo et al.	2021	1		Mouse	Wildtype	Male		THC	10	High	P28-48	4	1	i.p.	Vehicle			Open Field	Novelty-induced	long-term	1	19	20	Yes	Mean_veh	9.37	SE_veh	0.87	Mean_exp	11.06	SE_exp	0.69	Graphs			Unclear	Unclear	Unclear	Yes
Lemolo et al.	2021	2		Mouse	Wildtype	Male		THC	10	High	P28-48	4	1	i.p.	Vehicle			Prepulse Inhibition		long-term	1	23	24	Yes	Mean_veh	37.17	SE_veh	4.65	Mean_exp	41.08	SE_exp	2.98	Graphs			Unclear	Unclear	Unclear	Yes
Lemolo et al.	2021	3		Mouse	Wildtype	Male		THC	10	High	P28-48	4	1	i.p.	Vehicle			Social Interaction	Social motivation	long-term	1	19	17	Yes	Mean_veh	0.25	SE_veh	0.222393	Mean_exp	0.16	SE_exp	0.210363	Graphs		graph from supplementary	Unclear	Unclear	Unclear	Yes
Lemolo et al.	2021	4		Mouse	Wildtype	Female		THC	10	High	P28-48	4	1	i.p.	Vehicle			Open Field	Novelty-induced	long-term	1	19	18	Yes	Mean_veh	16.67	SE_veh	0.94	Mean_exp	18.49	SE_exp	0.94	Graphs			Unclear	Unclear	Unclear	Yes
Lemolo et al.	2021	5		Mouse	Wildtype	Female		THC	10	High	P28-48	4	1	i.p.	Vehicle			Prepulse Inhibition		long-term	1	24	23	Yes	Mean_veh	42.75	SE_veh	3.16	Mean_exp	33.09	SE_exp	3.16	Graphs			Unclear	Unclear	Unclear	Yes
Lemolo et al.	2021	6		Mouse	Wildtype	Female		THC	10	High	P28-48	4	1	i.p.	Vehicle			Social Interaction	Social motivation	long-term	1	16	15	Yes	Mean_veh	0.3	SE_veh	0.244898	Mean_exp	0.21	SE_exp	0.217361	Graphs		graph from supplementary	Unclear	Unclear	Unclear	Yes
Poulia et al.	2021	1		Rat	Wildtype	Male		THC	0.3-1-3	Escalating	P35-45	5	2	i.p.	Vehicle			Open Field	Novelty-induced	long-term	1	8	9	Yes	Mean_veh	135.66	SE_veh	45.22	Mean_exp	506.46	SE_exp	108.53	Graphs		unit:cm, between 30-45min	Yes	Unclear	Yes	Yes
Poulia et al.	2021	2		Rat	Wildtype	Male		THC	0.3-1-3	Escalating	P35-45	5	2	i.p.	Vehicle			Prepulse Inhibition		long-term	1	10	10	Yes	Mean_veh	50.31	SE_veh	6.02	Mean_exp	59.79	SE_exp	4.37	Graphs			Yes	Unclear	Yes	Yes
Poulia et al.	2021	3		Rat	Wildtype	Male		THC	0.3-1-3	Escalating	P35-45	5	2	i.p.	Vehicle			Set Shifting		long-term	1	8	12	Yes	Mean_veh	6.45	SE_veh	0.54	Mean_exp	7.42	SE_exp	0.59	Graphs			Yes	Unclear	Yes	Yes
Poulia et al.	2021	4		Rat	Wildtype	Male		THC	0.3-1-3	Escalating	P35-45	5	2	i.p.	Vehicle			Memory Discrimination	Novel object location	long-term	1	10	12	Yes	Mean_veh	0.62	SE_veh	0.09	Mean_exp	0.09	SE_exp	0.05	Graphs			Yes	Unclear	Yes	Yes
Poulia et al.	2021	5		Rat	Wildtype	Male		THC	0.3-1-3	Escalating	P35-45	5	2	i.p.	Vehicle			Morris Water		long-term	1	7	7	Yes	Mean_veh	12.79	SE_veh	1.24	Mean_exp	15.27	SE_exp	2.1	Graphs		latency to reach hidden platform	Unclear	Unclear	Yes	Yes
Hamidullah et al.	2021	1		Rat	Wildtype	Male		THC	10mg/4 mice	Low	P28-42	4	1/2	inhaled				Memory Discrimination	Novel object	long-term	1	6	6	Yes	Mean_veh	0.5333	SE_veh	0.1258	Mean_exp	0.6027	SE_exp	0.1062	Graphs		5min interval, 1hr interval data not included	Yes	Unclear	Yes	Unclear
Alteba et al	2021	1		Rat	Wildtype	Male		URB597	0.4		P30-45	5	1	i.p.	Vehicle	assumed frquency 1/day		Open Field	Novelty-induced	long-term	1	8	8	No(specify)	Mean_veh	82.5	SE_veh	6.60898	Mean_exp	103	SE_exp	8.20496	Author contacted	SE- data request sent	line crossing	Yes	Unclear	Unclear	Yes
Alteba et al	2021	2		Rat	Wildtype	Male		URB597	0.4		P30-45	5	1	i.p.	Vehicle	assumed frquency 1/day		Social Interaction	Social preference	long-term	1	8	8	No(specify)	Mean_veh	0.53701	SE_veh	0.0314623	Mean_exp	0.433568	SE_exp	0.0241364	Author contacted	SE- data request sent	Investigation ratio, not DI	Yes	Unclear	Unclear	Yes
Alteba et al	2021	3		Rat	Wildtype	Male		URB597	0.4		P30-45	5	1	i.p.	Vehicle	assumed frquency 1/day		Social Interaction	Social motivation	long-term	1	8	8	No(specify)	Mean_veh	0.72407	SE_veh	0.0289037	Mean_exp	0.596817	SE_exp	0.0202912	Author contacted	SE- data request sent	Investigation ratio, not DI	Yes	Unclear	Unclear	Yes
Alteba et al	2021	4		Rat	Wildtype	Male		URB597	0.4		P45-60	7	1	i.p.	Vehicle	assumed frquency 1/day		Open Field	Novelty-induced	long-term	1	8	8	No(specify)	Mean_veh	57.7188	SE_veh	4.74987	Mean_exp	77.5	SE_exp	4.38748	Author contacted		line crossing	Yes	Unclear	Unclear	Yes
Alteba et al	2021	5		Rat	Wildtype	Male		URB597	0.4		P45-60	7	1	i.p.	Vehicle	assumed frquency 1/day		Social Interaction	Social preference	long-term	1	8	8	No(specify)	Mean_veh	0.602598	SE_veh	0.0197441	Mean_exp	0.555564	SE_exp	0.0212355904362888	Author contacted		Investigation ratio, not DI	Yes	Unclear	Unclear	Yes
Alteba et al	2021	6		Rat	Wildtype	Male		URB597	0.4		P45-60	7	1	i.p.	Vehicle	assumed frquency 1/day		Social Interaction	Social motivation	long-term	1	8	8	No(specify)	Mean_veh	0.673536	SE_veh	0.0392713	Mean_exp	0.675886	SE_exp	0.0213225	Author contacted		Investigation ratio, not DI	Yes	Unclear	Unclear	Yes
Alteba et al	2021	7		Rat	Wildtype	Female		URB597	0.4		P30-45	5	1	i.p.	Vehicle	assumed frquency 1/day		Open Field	Novelty-induced	long-term	1	8	8	No(specify)	Mean_veh	67.5	SE_veh	11.0405	Mean_exp	103	SE_exp	8.20496	Author contacted		line crossing	Yes	Unclear	Unclear	Yes
Alteba et al	2021	8		Rat	Wildtype	Female		URB597	0.4		P30-45	5	1	i.p.	Vehicle	assumed frquency 1/day		Social Interaction	Social preference	long-term	1	8	8	No(specify)	Mean_veh	0.551994	SE_veh	0.0119669	Mean_exp	0.522773	SE_exp	0.0281343	Author contacted		Investigation ratio, not DI	Yes	Unclear	Unclear	Yes
Alteba et al	2021	9		Rat	Wildtype	Female		URB597	0.4		P30-45	5	1	i.p.	Vehicle	assumed frquency 1/day		Social Interaction	Social motivation	long-term	1	8	8	No(specify)	Mean_veh	0.600423	SE_veh	0.0264311	Mean_exp	0.539976	SE_exp	0.0330398	Author contacted		Investigation ratio, not DI	Yes	Unclear	Unclear	Yes
Alteba et al	2021	10		Rat	Wildtype	Female		URB597	0.4		P45-60	7	1	i.p.	Vehicle	assumed frquency 1/day		Open Field	Novelty-induced	long-term	1	8	8	No(specify)	Mean_veh	65.625	SE_veh	4.53533	Mean_exp	76.25	SE_exp	3.07496	Author contacted	SE- data request sent	line crossing	Yes	Unclear	Unclear	Yes
Alteba et al	2021	11		Rat	Wildtype	Female		URB597	0.4		P45-60	7	1	i.p.	Vehicle	assumed frquency 1/day		Social Interaction	Social preference	long-term	1	8	8	No(specify)	Mean_veh	0.599262	SE_veh	0.0283731	Mean_exp	0.585953	SE_exp	0.0267281	Author contacted	SE- data request sent	Investigation ratio, not DI	Yes	Unclear	Unclear	Yes
Alteba et al	2021	12		Rat	Wildtype	Female		URB597	0.4		P45-60	7	1	i.p.	Vehicle	assumed frquency 1/day		Social Interaction	Social motivation	long-term	1	8	8	No(specify)	Mean_veh	0.710648	SE_veh	0.0431108	Mean_exp	0.638872	SE_exp	0.0582365	Author contacted	SE- data request sent	Investigation ratio, not DI	Yes	Unclear	Unclear	Yes
De Felice et al.	2020	1		Rat	Wildtype	Male		THC	2.5-5-10	Escalating	P35-45	5	2	i.p.	Vehicle			Social Interaction	Social preference	long-term	1	8	11	No(specify)	Mean_veh	78.01	SE_veh	4.19	Mean_exp	54.97	SE_exp	4.19	Graphs		Investigation ratio, not DI	Unclear	Unclear	Unclear	Yes
De Felice et al.	2020	2		Rat	Wildtype	Male		THC	2.5-5-10	Escalating	P35-45	5	2	i.p.	Vehicle			Social Interaction	Social motivation	long-term	1	8	11	No(specify)	Mean_veh	78.53	SE_veh	4.72	Mean_exp	73.82	SE_exp	3.14	Graphs		Investigation ratio, not DI	Unclear	Unclear	Unclear	Yes
De Felice et al.	2020	3		Rat	Wildtype	Male		THC	2.5-5-10	Escalating	P35-45	5	2	i.p.	Vehicle			Prepulse Inhibition		long-term	1	8	11	Yes	Mean_veh	76.92	SE_veh	3.85	Mean_exp	49.23	SE_exp	6.54	Graphs			Unclear	Unclear	Unclear	Yes
De Felice et al.	2020	4		Rat	Wildtype	Male		THC	2.5-5-10	Escalating	P35-45	5	2	i.p.	Vehicle			Memory Discrimination	Novel object	long-term	1	10	11	No(specify)	Mean_veh	79.18	SE_veh	2.34	Mean_exp	34.02	SE_exp	2.64	Graphs		Investigation ratio, not DI	Unclear	Unclear	Unclear	Yes
De Felice et al.	2020	5		Rat	Wildtype	Male		THC	2.5-5-10	Escalating	P35-45	5	2	i.p.	Vehicle			Sucrose Preference		long-term	1	8	11	Yes	Mean_veh	97.9	SE_veh	0.2	Mean_exp	96.79	SE_exp	0.54	Graphs			Unclear	Unclear	Unclear	Yes
Musa et al.	2020	1		Mouse	Wildtype	Male		5-MDMB-PICA	0.01		P37-51	6	1	i.p.	Vehicle			Memory Alternation	Y maze	long-term	1	8-10	8	Yes	t	0.823	df	16					Text			Unclear	yes	Yes	Yes
Musa et al.	2020	2		Mouse	Wildtype	Male		5-MDMB-PICA	0.01		P37-51	6	1	i.p.	Vehicle			Memory Discrimination	Novel object	long-term	1	8-10	8	No(specify)	t	0.11	df	13					Text		Investigation ratio, not DI	Unclear	yes	Yes	Yes
Chen et al.	2020	1		Mouse	Wildtype	Male		THC	3	Middle	P28-49	4	1	i.p.	Vehicle			Memory Alternation	T maze	long-term	1	4-14	4-14	Yes	Mean_veh	78.4	SE_veh	4.1	Mean_exp	63.9	SE_exp	4.5	Graphs		15s Delayed % correct spontaneous alternation	Unclear	Unclear	Yes	Unclear
Chen et al.	2020	2		Mouse	Wildtype	Male		THC	3	Middle	P28-49	4	1	i.p.	Vehicle			Social Interaction	Social preference	long-term	1	12	15	Yes	Mean_veh	209.85±7.3	SE_veh	233.58±14.6	Mean_exp	231.75±18.25	SE_exp	228.1±9.13	Graphs		investigation time	Unclear	Unclear	Yes	Unclear
Chen et al.	2020	3		Mouse	Wildtype	Male		THC	3	Middle	P28-49	4	1	i.p.	Vehicle			Social Interaction	Social motivation	long-term	1	12	15	Yes	Mean_veh	201.82±9.09	SE_veh	287.27±10.91	Mean_exp	210.91±12.73	SE_exp	267.27±12.73	Graphs		investigation time	Unclear	Unclear	Yes	Unclear
Chen et al.	2020	4		Mouse	Wildtype	Female		THC	3	Middle	P28-49	4	1	i.p.	Vehicle			Memory Alternation	T maze	long-term	1	4-14	4-14	Yes	Mean_veh	78.6	SE_veh	4.4	Mean_exp	59.9	SE_exp	4.6	Graphs		15s Delayed % correct spontaneous alternation	Unclear	Unclear	Yes	Unclear
Chen et al.	2020	5		Mouse	Wildtype	Female		THC	3	Middle	P28-49	4	1	i.p.	Vehicle			Social Interaction	Social preference	long-term	1	12	9	Yes	Mean_veh	231.75±18.25	SE_veh	208.03±12.77	Mean_exp	244.53±21.89	SE_exp	220.8±16.43	Graphs		investigation time	Unclear	Unclear	Yes	Unclear
Chen et al.	2020	6		Mouse	Wildtype	Female		THC	3	Middle	P28-49	4	1	i.p.	Vehicle			Social Interaction	Social motivation	long-term	1	12	9	Yes	Mean_veh	198.18±9.09	SE_veh	274.55±12.72	Mean_exp	227.27±23.64	SE_exp	254.55±23.63	Graphs		investigation time	Unclear	Unclear	Yes	Unclear
Abboussi et al.	2020	1		Rat	Wildtype	Male		WIN55,212–2	1.2	Low	P30-49	5	1-3	i.p.	Vehicle			Prepulse Inhibition		long-term	1	12	12	Yes	Mean_veh	29.58	SE_veh	2.31	Mean_exp	12.38	SE_exp	1.68	Graphs		at PP80	Unclear	Unclear	Unclear	Unclear
De Gregorio et al.	2020	1		Rat	Wildtype	Male		THC	1	Low	P30-50	5	1	i.p.	Vehicle			Open Field	Novelty-induced	long-term	1	7-10	7-10	Yes	Mean_veh	1443.48	SE_veh	400	Mean_exp	952.17	SE_exp	265.22	Graphs			Yes	yes	Yes	Unclear
De Gregorio et al.	2020	2		Rat	Wildtype	Male		THC	1	Low	P30-50	5	1	i.p.	Vehicle			Sucrose Preference		long-term	1	7-10	7-10	Yes	Mean_veh	93.16	SE_veh	1.37	Mean_exp	66.48	SE_exp	2.96	Graphs			Yes	yes	Yes	Unclear
Gibula-Tarlowska et al.	2020	1		Rat	Wildtype	Male		THC	1	Low	P30-40	5	1/3	i.p.	Other	saline		Barnes Maze		short-term	1	8-10	8-10	Yes	Mean_veh	13.23	SE_veh	2.42	Mean_exp	24.84	SE_exp	2.1	Graphs			Unclear	Unclear	Unclear	Yes
Gibula-Tarlowska et al.	2020	2		Rat	Wildtype	Male		THC	1	Low	P30-40	5	1/3	i.p.	Other	saline		Barnes Maze		long-term	1	8-10	8-10	Yes	Mean_veh	6.13	SE_veh	2.26	Mean_exp	10.48	SE_exp	2.1	Graphs		repeated?	Unclear	Unclear	Unclear	Yes
Gibula-Tarlowska et al.	2020	3		Rat	Wildtype	Male		THC	1	Low	P30-40	5	1/3	i.p.	Other	saline		Open Field	Novelty-induced	long-term		8-10	8-10	Yes	Mean_veh	54.74	SE_veh	4.09	Mean_exp	60.34	SE_exp	4.39	Graphs			Unclear	Unclear	Unclear	Yes
Poulia et al.	2019	1		Rat	Wildtype	Male		THC	0.3-1-3	Escalating	P35-46	7	2	i.p.	Vehicle			Open Field	Novelty-induced	long-term	1	9	9	No(specify)	Mean_veh	1634.41	SE_veh	215.05	Mean_exp	2387.1	SE_exp	215.05	Graphs		ambulatory count	Unclear	Unclear	Unclear	Yes
Poulia et al.	2019	2		Rat	Wildtype	Male		THC	0.3-1-3	Escalating	P35-46	7	2	i.p.	Vehicle			Memory Discrimination	Novel object location	long-term	1	10	12	Yes	Mean_veh	0.62	SE_veh	0.28	Mean_exp	0.09	SE_exp	0.16	Graphs			Unclear	Unclear	Unclear	Yes
Poulia et al.	2019	3		Rat	Wildtype	Female		THC	0.3-1-3	Escalating	P35-46	7	2	i.p.	Vehicle			Open Field	Novelty-induced	long-term	1	9	9	No(specify)	Mean_veh	3026.32	SE_veh	315.79	Mean_exp	2421.05	SE_exp	263.16	Graphs		ambulatory count	Unclear	Unclear	Unclear	Yes
Poulia et al.	2019	4		Rat	Wildtype	Female		THC	0.3-1-3	Escalating	P35-46	7	2	i.p.	Vehicle			Memory Discrimination	Novel object location	long-term	1	9	10	Yes	Mean_veh	0.38	SE_veh	0.08	Mean_exp	0.03	SE_exp	0.01	Graphs			Unclear	Unclear	Unclear	Yes
Garcia-Mompo et al.	2020	1		Mouse	Wildtype	Male		THC	10	High	P28-48	4	1	i.p.	Vehicle			Prepulse Inhibition		long-term	1	16	16	Yes	Mean_veh	17.57	SE_veh	3.39	Mean_exp	24.44	SE_exp	3.57	Graphs			Yes	yes	Yes	Yes
Bis-Humbert et al.	2020	1		Rat	Wildtype	Male		CBD	3		P27-33	4	1	i.p.	Vehicle			Open Field	Novelty-induced	short-term	2	9	10	Yes	Mean_veh	99.59	SE_veh	12.34	Mean_exp	98.77	SE_exp	9.05	Graphs		unit: % compared to control	Unclear	yes	Yes	Unclear
Bis-Humbert et al.	2020	2		Rat	Wildtype	Male		CBD	10		P27-33	4	1	i.p.	Vehicle			Open Field	Novelty-induced	short-term	2	9	9	Yes	Mean_veh	99.59	SE_veh	12.34	Mean_exp	90.53	SE_exp	9.06	Graphs		unit: % compared to control	Unclear	yes	Yes	Unclear
Bis-Humbert et al.	2020	3		Rat	Wildtype	Male		CBD	30		P27-33	4	1	i.p.	Vehicle			Open Field	Novelty-induced	short-term	1	8	8	Yes	Mean_veh	99.57	SE_veh	24.24	Mean_exp	94.37	SE_exp	24.24	Graphs		unit: % compared to control	Unclear	yes	Yes	Unclear
Bis-Humbert et al.	2020	4		Rat	Wildtype	Male		CBD	3		P27-33	4	1	i.p.	Vehicle			Sucrose Preference		short-term	2	9	10	No(specify)	Mean_veh	100.35	SE_veh	7.04	Mean_exp	95.95	SE_exp	7.04	Graphs		sucrose intake unit: % compared to control	Unclear	yes	Yes	Unclear
Bis-Humbert et al.	2020	5		Rat	Wildtype	Male		CBD	10		P27-33	4	1	i.p.	Vehicle			Sucrose Preference		short-term	2	9	9	No(specify)	Mean_veh	100.35	SE_veh	7.04	Mean_exp	111.8	SE_exp	10.56	Graphs		sucrose intake unit: % compared to control	Unclear	yes	Yes	Unclear
Bis-Humbert et al.	2020	6		Rat	Wildtype	Male		CBD	30		P27-33	4	1	i.p.	Vehicle			Sucrose Preference		short-term	1	8	8	No(specify)	Mean_veh	100.33	SE_veh	8.37	Mean_exp	113.71	SE_exp	10.04	Graphs		sucrose intake unit: % compared to control	Unclear	yes	Yes	Unclear
Bhatt et al.	2020	1		Rat	Wildtype	Male		THC	1.25	Low	P29-43	7	1	i.p.	Vehicle			Memory Discrimination	Novel texture	short-term	1	3	5	No(specify)	Mean_veh	67.31	SE_veh	2.69	Mean_exp	58.46	SE_exp	5	Graphs		Investigation ratio, not DI	Yes	Unclear	Yes	Unclear
Bhatt et al.	2020	2		Rat	Wildtype	Male		THC	1.25	Low	P29-43	7	1	i.p.	Vehicle			Open Field	Novelty-induced	short-term	1	3	5	Yes	Mean_veh	66.03	SE_veh	7.12	Mean_exp	67.67	SE_exp	4.66	Graphs			Yes	Unclear	Yes	Unclear
Bhatt et al.	2020	3		Rat	Wildtype	Female		THC	1.25	Low	P29-43	7	1	i.p.	Vehicle			Memory Discrimination	Novel texture	short-term	1	3	5	No(specify)	Mean_veh	62.31	SE_veh	3.84	Mean_exp	48.46	SE_exp	6.54	Graphs		Investigation ratio, not DI	Yes	Unclear	Yes	Unclear
Bhatt et al.	2020	4		Rat	Wildtype	Female		THC	1.25	Low	P29-43	7	1	i.p.	Vehicle			Open Field	Novelty-induced	short-term	1	3	5	Yes	Mean_veh	77.81	SE_veh	5.2	Mean_exp	71.51	SE_exp	2.19	Graphs			Yes	Unclear	Yes	Unclear
Cossio et al.	2020	1		Rat	Wildtype	Both		CP55,940	0.4		P25-39	4	1	i.p.	Vehicle			Social Interaction	Social motivation	short-term	2	21	24	Yes	Mean±SE_V-Obj	92.2 ± 6.4	SE_veh	252.6 ± 14.7	Mean±SE_E-Obj	94.3 ± 6.5	Mean±SE_E-Ani	199.7 ± 12.5	Text	sample sizes	investigation time	Yes	yes	Yes	Yes
Cossio et al.	2020	2		Rat	Wildtype	Both		AM251	0.5		P25-39	4	1	i.p.	Vehicle			Social Interaction	Social motivation	short-term	2	21	24	Yes	Mean±SE_V-Obj	92.2 ± 6.4	SE_veh	252.6 ± 14.7	Mean±SE_E-Obj	93.6 ± 6.3	Mean±SE_E-Ani	217.4 ± 14.2	Text	sample sizes	investigation time	Yes	yes	Yes	Yes
El-Shamarka et al.	2020	1		Rat	Wildtype	Male		cannabis resin extract (10% THC)	20	Very high	timing N/A duration 30d		1	s.c.				Morris Water		short-term	1	8-10	8-10	Yes	Mean_veh	36.62	SE_veh	3.37	Mean_exp	9.01	SE_exp	1.51	Graphs		data contradict description	Yes	Unclear	Unclear	Yes
El-Shamarka et al.	2020	2		Rat	Wildtype	Male		cannabis resin extract (10% THC)	20	Very high	timing N/A duration 30d		1	s.c.				Open Field	Novelty-induced	short-term	1	8-10	8-10	No(specify)										No useful measure
Bruijnzeel et al.	2019	1		Rat	Wildtype	Male		THC	2.5-5-10	Escalating	P35-45	5	2	i.p.	Vehicle			Open Field	Novelty-induced	long-term	1	10	10	Yes	Mean_veh	2473.68	SE_veh	184.21	Mean_exp	2842.11	SE_exp	236.84	Graphs			Unclear	Unclear	Yes	Yes
Bruijnzeel et al.	2019	2		Rat	Wildtype	Male		THC	2.5-5-10	Escalating	P35-45	5	2	i.p.	Vehicle			Sucrose Preference		long-term	1	10	10	Yes	Mean_veh	93.8	SE_veh	1.1	Mean_exp	88.3	SE_exp	5.2	Text			Unclear	Unclear	Yes	Yes
Bruijnzeel et al.	2019	3		Rat	Wildtype	Male		THC	2.5-5-10	Escalating	P35-45	5	2	i.p.	Vehicle			Memory Discrimination	Novel object	long-term	1	10	10	Yes	Mean_veh	0.33	SE_veh	0.13	Mean_exp	0.62	SE_exp	0.08	Graphs			Unclear	Unclear	Yes	Yes
Bruijnzeel et al.	2019	4		Rat	Wildtype	Female		THC	2.5-5-10	Escalating	P35-45	5	2	i.p.	Vehicle			Open Field	Novelty-induced	long-term	1	10	10	Yes	Mean_veh	3131.58	SE_veh	236.84	Mean_exp	2973.68	SE_exp	184.21	Graphs			Unclear	Unclear	Yes	Yes
Bruijnzeel et al.	2019	5		Rat	Wildtype	Female		THC	2.5-5-10	Escalating	P35-45	5	2	i.p.	Vehicle			Sucrose Preference		long-term	1	10	10	Yes	Mean_veh	87	SE_veh	6.4	Mean_exp	92.9	SE_exp	3	Text			Unclear	Unclear	Yes	Yes
Bruijnzeel et al.	2019	6		Rat	Wildtype	Female		THC	2.5-5-10	Escalating	P35-45	5	2	i.p.	Vehicle			Memory Discrimination	Novel object	long-term	1	10	10	Yes	Mean_veh	0.41	SE_veh	0.03	Mean_exp	0.36	SE_exp	0.08	Graphs			Unclear	Unclear	Yes	Yes
Bruijnzeel et al.	2019	7		Rat	Wildtype	Male		Cannabis smoke (5.6% THC, 0% cannabidiol (CBD), and 0.4% cannabinol (CBN))	1h/day 250mg/m³		P29-49	7	1	i.p.	Placebo			Open Field	Novelty-induced	long-term	1	12	12	Yes	Mean_veh	3210.53	SE_veh	184.21	Mean_exp	2763.16	SE_exp	184.21	Graphs			Unclear	Unclear	Yes	Yes
Bruijnzeel et al.	2019	8		Rat	Wildtype	Male		Cannabis smoke (5.6% THC, 0% cannabidiol (CBD), and 0.4% cannabinol (CBN))	1h/day 250mg/m³		P29-49	7	1	i.p.	Placebo			Sucrose Preference		long-term	1	12	12	Yes	Mean_veh	80.4	SE_veh	7.3	Mean_exp	89.3	SE_exp	3.2	Text			Unclear	Unclear	Yes	Yes
Bruijnzeel et al.	2019	9		Rat	Wildtype	Male		Cannabis smoke (5.6% THC, 0% cannabidiol (CBD), and 0.4% cannabinol (CBN))	1h/day 250mg/m³		P29-49	7	1	i.p.	Placebo			Memory Discrimination	Novel object	long-term	1	12	12	Yes	Mean_veh	0.32	SE_veh	0.08	Mean_exp	0.3	SE_exp	0.07	Graphs			Unclear	Unclear	Yes	Yes
Bruijnzeel et al.	2019	10		Rat	Wildtype	Female		Cannabis smoke (5.6% THC, 0% cannabidiol (CBD), and 0.4% cannabinol (CBN))	1h/day 250mg/m³		P29-49	7	1	i.p.	Placebo			Open Field	Novelty-induced	long-term	1	12	12	Yes	Mean_veh	3157.89	SE_veh	184.22	Mean_exp	3342.11	SE_exp	210.52	Graphs			Unclear	Unclear	Yes	Yes
Bruijnzeel et al.	2019	11		Rat	Wildtype	Female		Cannabis smoke (5.6% THC, 0% cannabidiol (CBD), and 0.4% cannabinol (CBN))	1h/day 250mg/m³		P29-49	7	1	i.p.	Placebo			Sucrose Preference		long-term	1	12	12	Yes	Mean_veh	86.2	SE_veh	7.3	Mean_exp	92.5	SE_exp	4.1	Text			Unclear	Unclear	Yes	Yes
Bruijnzeel et al.	2019	12		Rat	Wildtype	Female		Cannabis smoke (5.6% THC, 0% cannabidiol (CBD), and 0.4% cannabinol (CBN))	1h/day 250mg/m³		P29-49	7	1	i.p.	Placebo			Memory Discrimination	Novel object	long-term	1	12	12	Yes	Mean_veh	0.46	SE_veh	0.07	Mean_exp	0.38	SE_exp	0.06	Graphs			Unclear	Unclear	Yes	Yes
Friedman et al.	2019	1		Rat	Wildtype	Male		THC	1	Low	P28-45	4	1	i.p.	Vehicle			Open Field	Novelty-induced	long-term	1	8	8	No(specify)	Mean_veh	3293.65	SE_veh	595.24	Mean_exp	3055.56	SE_exp	595.23	Graphs		beam breaks	Unclear	Unclear	Unclear	Unclear
Friedman et al.	2019	2		Rat	Wildtype	Male		THC	1	Low	P28-45	4	1	i.p.	Vehicle			Open Field	Psychostimulant-induced	long-term	1	8	8	No(specify)	Mean_veh	6865.08	SE_veh	595.24	Mean_exp	7976.19	SE_exp	595.24	Graphs		beam breaks	Unclear	Unclear	Unclear	Unclear
Abela et al.	2019	1		Rat	Wildtype	Male		THC	2.5-5-10	Escalating	P35-45	5	2	i.p.	Vehicle			Prepulse Inhibition		short-term	1	14	15	Yes	Mean_veh	38.84	SE_veh	7.14	Mean_exp	35.71	SE_exp	6.7	Graphs			Unclear	Unclear	Unclear	Yes
Abela et al.	2019	2		Rat	Wildtype	Male		THC	2.5-5-10	Escalating	P35-45	5	2	i.p.	Vehicle			Prepulse Inhibition		long-term	1	14	15	Yes	Mean_veh	56.7	SE_veh	6.25	Mean_exp	42.86	SE_exp	5.35	Graphs		repeated exp in adulthood	Unclear	Unclear	Unclear	Yes
Jouroukhin et al.	2019	1		Mouse	DN-DISC1 -/-	Male		THC	8	High	P30-51	5	1	s.c.	Vehicle			Memory Alternation	Y maze	long-term	1	6	10	Yes	Mean_veh	41.56	SE_veh	3.89	Mean_exp	26.92	SE_exp	2.5	Graphs			Unclear	Unclear	Unclear	Yes
Jouroukhin et al.	2019	2		Mouse	DN-DISC1 -/-	Male		THC	8	High	P30-51	5	1	s.c.	Vehicle			Memory Discrimination	Novel object	long-term	1	6	10	No(specify)	Mean_veh	55.23	SE_veh	2.59	Mean_exp	40.2	SE_exp	1.96	Graphs			Unclear	Unclear	Unclear	Yes
Jouroukhin et al.	2019	3		Mouse	DN-DISC1 -/-	Male		THC	8	High	P30-51	5	1	s.c.	Vehicle			Memory Discrimination	Novel object location	long-term	1	6	10	No(specify)	Mean_veh	63.44	SE_veh	2.81	Mean_exp	53.59	SE_exp	3.37	Graphs			Unclear	Unclear	Unclear	Yes
Jouroukhin et al.	2019	4		Mouse	DN-DISC1 -/-	Female		THC	8	High	P30-51	5	1	s.c.	Vehicle			Memory Alternation	Y maze	long-term	1	16	16	Yes	Mean_veh	47.5	SE_veh	4.37	Mean_exp	22.88	SE_exp	5.93	Graphs			Unclear	Unclear	Unclear	Yes
Jouroukhin et al.	2019	5		Mouse	DN-DISC1 -/-	Female		THC	8	High	P30-51	5	1	s.c.	Vehicle			Memory Discrimination	Novel object	long-term	1	16	16	No(specify)	Mean_veh	61.32	SE_veh	5.66	Mean_exp	64.15	SE_exp	7.55	Graphs			Unclear	Unclear	Unclear	Yes
Jouroukhin et al.	2019	6		Mouse	DN-DISC1 -/-	Female		THC	8	High	P30-51	5	1	s.c.	Vehicle			Memory Discrimination	Novel object location	long-term	1	16	16	No(specify)	Mean_veh	73.58	SE_veh	4.72	Mean_exp	81.13	SE_exp	2.83	Graphs			Unclear	Unclear	Unclear	Yes
Jouroukhin et al.	2019	7		Mouse	Wildtype	Male		THC	8	High	P30-51	5	1	s.c.	Vehicle			Memory Alternation	Y maze	long-term	2	6	10	Yes	Mean_veh	42.31	SE_veh	4.23	Mean_exp	42.31	SE_exp	3.46	Graphs			Unclear	Unclear	Unclear	Yes
Jouroukhin et al.	2019	8		Mouse	Wildtype	Male		THC	8	High	P30-51	5	1	s.c.	Vehicle			Memory Discrimination	Novel object	long-term	2	6	10	No(specify)	Mean_veh	58.69	SE_veh	2.31	Mean_exp	60.23	SE_exp	1.55	Graphs			Unclear	Unclear	Unclear	Yes
Jouroukhin et al.	2019	9		Mouse	Wildtype	Male		THC	8	High	P30-51	5	1	s.c.	Vehicle			Memory Discrimination	Novel object location	long-term	2	6	10	No(specify)	Mean_veh	67.09	SE_veh	3.37	Mean_exp	60.76	SE_exp	2.95	Graphs			Unclear	Unclear	Unclear	Yes
Jouroukhin et al.	2019	10		Mouse	Wildtype	Female		THC	8	High	P30-51	5	1	s.c.	Vehicle			Memory Alternation	Y maze	long-term	2	16	8	Yes	Mean_veh	38.14	SE_veh	2.97	Mean_exp	44.07	SE_exp	3.82	Graphs			Unclear	Unclear	Unclear	Yes
Jouroukhin et al.	2019	11		Mouse	Wildtype	Female		THC	8	High	P30-51	5	1	s.c.	Vehicle			Memory Discrimination	Novel object	long-term	1	16	8	No(specify)	Mean_veh	63.46	SE_veh	5.77	Mean_exp	59.62	SE_exp	4.8	Graphs			Unclear	Unclear	Unclear	Yes
Jouroukhin et al.	2019	12		Mouse	Wildtype	Female		THC	8	High	P30-51	5	1	s.c.	Vehicle			Memory Discrimination	Novel object location	long-term	1	16	8	No(specify)	Mean_veh	66.35	SE_veh	2.88	Mean_exp	74.04	SE_exp	3.84	Graphs			Unclear	Unclear	Unclear	Yes
Kasten et al.	2019	1		Mouse	Wildtype	Male		THC	10	High	~P30-51	5	pseudorandom, 8/21	i.p.	Vehicle			Open Field	Novelty-induced	long-term	3	7-10	7-10	Yes	Mean_veh	3539.57	SE_veh	201.44	Mean_exp	3309.35	SE_exp	175.06	Graphs			Unclear	Unclear	Unclear	Unclear
Kasten et al.	2019	2		Mouse	Wildtype	Male		THC	10	High	~P30-51	5	pseudorandom, 8/21	i.p.	Vehicle			Memory Discrimination	Novel object	short-term	3	7-10	7-10	Yes	Mean_veh	0.27	SE_veh	0.1	Mean_exp	0.26	SE_exp	0.06	Graphs			Unclear	Unclear	Unclear	Unclear
Kasten et al.	2019	3		Mouse	Wildtype	Female		THC	10	High	~P30-51	5	pseudorandom, 8/21	i.p.	Vehicle			Open Field	Novelty-induced	long-term	3	7-10	7-10	Yes	Mean_veh	3444.44	SE_veh	239.81	Mean_exp	3644.28	SE_exp	219.83	Graphs			Unclear	Unclear	Unclear	Unclear
Kasten et al.	2019	4		Mouse	Wildtype	Female		THC	10	High	~P30-51	5	pseudorandom, 8/21	i.p.	Vehicle			Memory Discrimination	Novel object	short-term	3	7-10	7-10	Yes	Mean_veh	0.17	SE_veh	0.11	Mean_exp	0.22	SE_exp	0.07	Graphs			Unclear	Unclear	Unclear	Unclear
Kasten et al.	2019	5		Mouse	Wildtype	Male		CBD	20		~P30-51	5	pseudorandom, 8/21	i.p.	Vehicle			Open Field	Novelty-induced	long-term	3	7-10	7-10	Yes	Mean_veh	3539.57	SE_veh	201.44	Mean_exp	3424.46	SE_exp	239.81	Graphs			Unclear	Unclear	Unclear	Unclear
Kasten et al.	2019	6		Mouse	Wildtype	Male		CBD	20		~P30-51	5	pseudorandom, 8/21	i.p.	Vehicle			Memory Discrimination	Novel object	short-term	3	7-10	7-10	Yes	Mean_veh	0.27	SE_veh	0.1	Mean_exp	0.13	SE_exp	0	Graphs			Unclear	Unclear	Unclear	Unclear
Kasten et al.	2019	7		Mouse	Wildtype	Female		CBD	20		~P30-51	5	pseudorandom, 8/21	i.p.	Vehicle			Open Field	Novelty-induced	long-term	3	7-10	7-10	Yes	Mean_veh	3444.44	SE_veh	239.81	Mean_exp	3664.27	SE_exp	339.73	Graphs			Unclear	Unclear	Unclear	Unclear
Kasten et al.	2019	8		Mouse	Wildtype	Female		CBD	20		~P30-51	5	pseudorandom, 8/21	i.p.	Vehicle			Memory Discrimination	Novel object	short-term	3	7-10	7-10	Yes	Mean_veh	0.17	SE_veh	0.11	Mean_exp	0.26	SE_exp	0.07	Graphs			Unclear	Unclear	Unclear	Unclear
Kasten et al.	2019	9		Mouse	Wildtype	Male		THC+CBD	T10+C20		~P30-51	5	pseudorandom, 8/21	i.p.	Vehicle			Open Field	Novelty-induced	long-term	3	7-10	7-10	Yes	Mean_veh	3539.57	SE_veh	201.44	Mean_exp	3484.41	SE_exp	219.83	Graphs			Unclear	Unclear	Unclear	Unclear
Kasten et al.	2019	10		Mouse	Wildtype	Male		THC+CBD	T10+C20		~P30-51	5	pseudorandom, 8/21	i.p.	Vehicle			Memory Discrimination	Novel object	short-term	3	7-10	7-10	Yes	Mean_veh	0.27	SE_veh	0.1	Mean_exp	0.08	SE_exp	0.09	Graphs			Unclear	Unclear	Unclear	Unclear
Kasten et al.	2019	11		Mouse	Wildtype	Female		THC+CBD	T10+C20		~P30-51	5	pseudorandom, 8/21	i.p.	Vehicle			Open Field	Novelty-induced	long-term	3	7-10	7-10	Yes	Mean_veh	3444.44	SE_veh	239.81	Mean_exp	3404.48	SE_exp	239.8	Graphs			Unclear	Unclear	Unclear	Unclear
Kasten et al.	2019	12		Mouse	Wildtype	Female		THC+CBD	T10+C20		~P30-51	5	pseudorandom, 8/21	i.p.	Vehicle			Memory Discrimination	Novel object	short-term	3	7-10	7-10	Yes	Mean_veh	0.17	SE_veh	0.11	Mean_exp	0.28	SE_exp	0.1	Graphs			Unclear	Unclear	Unclear	Unclear
Nelson et al.	2019	1		Rat	Wildtype	Male		THC	3-5-10	Escalating	P30-45	5	1	s.c.	Other	oil		Sucrose Preference		short-term	1	10	10	Yes										unable to extract data from graph	2d after
Nelson et al.	2019	2		Rat	Wildtype	Male		THC	3-5-10-20	Escalating	P30-45	5	1	s.c.	Other	oil		Sucrose Preference		short-term	1	10	10	Yes										unable to extract data from graph	2d after
Nelson et al.	2019	3		Rat	Wildtype	Male		THC	3-5-10-20	Escalating	P30-45	5	1	s.c.	Other	oil		Barnes Maze		short-term	1	10	10	Yes			SE_veh							unable to extract data from graph
Nelson et al.	2019	4		Rat	Wildtype	Male		THC	3-5-10	Escalating	P30-45	5	1	s.c.	Other	oil		Barnes Maze		short-term	1	10	10	Yes										unable to extract data from graph
Dong et al.	2019	1		Mouse	Wildtype	Male		WIN55,212–2	2		P35-45	5	1	i.p.	Vehicle			Open Field	Novelty-induced	long-term	1	10	10	No(specify)	Mean_veh	16303.8	SE_veh	2658.23	Mean_exp	10455.7	SE_exp	1594.93	Graphs		Unit: locomotor activity counts	Unclear	Unclear	Unclear	Unclear
Dong et al.	2019	2		Mouse	Wildtype	Male		WIN55,212–2	2		P35-45	5	1	i.p.	Vehicle			Open Field	Novelty-induced	long-term	1	10	10	No(specify)	Mean_veh	31544.3	SE_veh	3721.52	Mean_exp	53873.4	SE_exp	10278.5	Graphs		Unit: locomotor activity counts	Unclear	Unclear	Unclear	Unclear
Pushkin et al.	2019	1		Mouse	Wildtype	Male		WIN55,212–2	2		P38-49	6	1	i.p.	Vehicle			Open Field	Novelty-induced	long-term	1	8-12	8-12	Yes	Mean_veh	30.61	SE_veh	3.63	Mean_exp	28.79	SE_exp	2.42	Graphs		unit: m	Yes	yes	yes	Unclear
Pushkin et al.	2019	2		Mouse	Wildtype	Female		WIN55,212–2	2		P38-49	6	1	i.p.	Vehicle			Open Field	Novelty-induced	long-term	1	6-10	6-10	Yes	Mean_veh	32.42	SE_veh	3.03	Mean_exp	36.67	SE_exp	3.63	Graphs		unit: m	Yes	yes	yes	Unclear
Pushkin et al.	2019	3		Mouse	Wildtype	Male		WIN55,212–2	0.2		P38-49	6	1	i.p.	Vehicle			Open Field	Novelty-induced	long-term	1	10-12	10-12	Yes	Mean_veh	27.2	SE_veh	2.52	Mean_exp	27.52	SE_exp	2.51	Graphs		unit: m	Yes	yes	yes	Unclear
Pushkin et al.	2019	4		Mouse	Wildtype	Female		WIN55,212–2	0.2		P38-49	6	1	i.p.	Vehicle			Open Field	Novelty-induced	long-term	1	11-13	11-13	Yes	Mean_veh	36.64	SE_veh	4.08	Mean_exp	32.86	SE_exp	3.15	Graphs		unit: m	Yes	yes	yes	Unclear
Saravia et al.	2019	1		Mouse	Wildtype	Both		THC	3-6-12	Escalating	P35-49	5	1	i.p.	Vehicle			Open Field	Novelty-induced	long-term	1	15-16	15-16	No(specify)	Mean_veh	316.67	SE_veh	53.84	Mean_exp	252.56	SE_exp	30.77	Graphs		horizontal counts	Unclear	yes	yes	Unclear
Saravia et al.	2019	2		Mouse	Wildtype	Both		THC	3-6-12	Escalating	P35-49	5	1	i.p.	Vehicle			Fear Conditioning		long-term	1	15-16	15-16	Yes	Mean_veh	36.95	SE_veh	7.68	Mean_exp	38.05	SE_exp	4.02	Graphs			Unclear	yes	yes	Unclear
Simone et al.	2018	1		Rat	Wildtype	Male		AM251	1		P30-44	5	1	i.p.	Vehicle			Fear Conditioning		long-term	1	8	8	Yes	Mean_veh	65.85	SE_veh	9.41	Mean_exp	70.25	SE_exp	8.89	Graphs			Unclear	Unclear	yes	Unclear
Simone et al.	2018	2		Rat	Wildtype	Female		AM251	1		P30-44	5	1	i.p.	Vehicle			Fear Conditioning		long-term	1	8	8	Yes	Mean_veh	72.43	SE_veh	6.17	Mean_exp	88.27	SE_exp	4.12	Graphs			Unclear	Unclear	yes	Unclear
Peres et al.	2018	1		Rat	Wildtype	Male		CBD	0.5		P30-60	5	1	i.p.	Vehicle			Fear Conditioning		long-term	1	10	10	Yes	Mean_veh	26.5	SE_veh	4.82333	Mean_exp	41.4167	SE_exp	6.02333	Text		converted absolute time to percentage	Unclear	yes	yes	yes
Peres et al.	2018	2		Rat	Wildtype	Male		CBD	1		P30-60	5	1	i.p.	Vehicle			Fear Conditioning		long-term	1	10	10	Yes	Mean_veh	26.5	SE_veh	4.82333	Mean_exp	43.4433	SE_exp	4.97333	Text		converted absolute time to percentage	Unclear	yes	yes	yes
Peres et al.	2018	3		Rat	Wildtype	Male		CBD	5		P30-60	5	1	i.p.	Vehicle			Fear Conditioning		long-term	1	10	10	Yes	Mean_veh	26.5	SE_veh	4.82333	Mean_exp	31.8767	SE_exp	6.39667	Text		converted absolute time to percentage	Unclear	yes	yes	yes
Peres et al.	2018	4		Rat	Wildtype	Male		CBD	0.5		P30-60	5	1	i.p.	Vehicle			Open Field	Novelty-induced	long-term	3	10	10	No(specify)	Mean_veh	63.58	SE_veh	7.17	Mean_exp	57.01	SE_exp	4.78	Graphs		Unit: number of ﬂoor squares entered	Unclear	yes	yes	yes
Peres et al.	2018	5		Rat	Wildtype	Male		CBD	1		P30-60	5	1	i.p.	Vehicle			Open Field	Novelty-induced	long-term	3	10	10	No(specify)	Mean_veh	63.58	SE_veh	7.17	Mean_exp	64.18	SE_exp	4.18	Graphs		Unit: number of ﬂoor squares entered	Unclear	yes	yes	yes
Peres et al.	2018	6		Rat	Wildtype	Male		CBD	5		P30-60	5	1	i.p.	Vehicle			Open Field	Novelty-induced	long-term	3	10	10	No(specify)	Mean_veh	63.58	SE_veh	7.17	Mean_exp	63.88	SE_exp	3.58	Graphs		Unit: number of ﬂoor squares entered	Unclear	yes	yes	yes
Peres et al.	2018	7		Rat	Wildtype	Male		CBD	0.5		P30-60	5	1	i.p.	Vehicle			Prepulse Inhibition		long-term	3	10	10	Yes	Mean_veh	42.41	SE_veh	8.07	Mean_exp	35.59	SE_exp	9.31	Graphs			Unclear	yes	yes	yes
Peres et al.	2018	8		Rat	Wildtype	Male		CBD	1		P30-60	5	1	i.p.	Vehicle			Prepulse Inhibition		long-term	3	10	10	Yes	Mean_veh	42.41	SE_veh	8.07	Mean_exp	42.62	SE_exp	3.93	Graphs			Unclear	yes	yes	yes
Peres et al.	2018	9		Rat	Wildtype	Male		CBD	5		P30-60	5	1	i.p.	Vehicle			Prepulse Inhibition		long-term	3	10	10	Yes	Mean_veh	42.41	SE_veh	8.07	Mean_exp	35.38	SE_exp	3.62	Graphs			Unclear	yes	yes	yes
Peres et al.	2018	10		Rat	Sponetaneous Hyperactive	Male		CBD	0.5		P30-60	5	1	i.p.	Vehicle			Open Field	Novelty-induced	long-term	3	10	10	No(specify)	Mean_veh	85.67	SE_veh	4.78	Mean_exp	66.27	SE_exp	6.27	Graphs		Unit: number of ﬂoor squares entered	Unclear	yes	yes	yes
Peres et al.	2018	11		Rat	Sponetaneous Hyperactive	Male		CBD	1		P30-60	5	1	i.p.	Vehicle			Open Field	Novelty-induced	long-term	3	10	10	No(specify)	Mean_veh	85.67	SE_veh	4.78	Mean_exp	83.28	SE_exp	3.29	Graphs		Unit: number of ﬂoor squares entered	Unclear	yes	yes	yes
Peres et al.	2018	12		Rat	Sponetaneous Hyperactive	Male		CBD	5		P30-60	5	1	i.p.	Vehicle			Open Field	Novelty-induced	long-term	3	10	10	No(specify)	Mean_veh	85.67	SE_veh	4.78	Mean_exp	83.28	SE_exp	6.87	Graphs		Unit: number of ﬂoor squares entered	Unclear	yes	yes	yes
Peres et al.	2018	13		Rat	Sponetaneous Hyperactive	Male		CBD	0.5		P30-60	5	1	i.p.	Vehicle			Prepulse Inhibition		long-term	3	10	10	Yes	Mean_veh	15.72	SE_veh	6.83	Mean_exp	50.9	SE_exp	5.17	Graphs			Unclear	yes	yes	yes
Peres et al.	2018	14		Rat	Sponetaneous Hyperactive	Male		CBD	1		P30-60	5	1	i.p.	Vehicle			Prepulse Inhibition		long-term	3	10	10	Yes	Mean_veh	15.72	SE_veh	6.83	Mean_exp	28.14	SE_exp	7.03	Graphs			Unclear	yes	yes	yes
Peres et al.	2018	15		Rat	Sponetaneous Hyperactive	Male		CBD	5		P30-60	5	1	i.p.	Vehicle			Prepulse Inhibition		long-term	3	10	10	Yes	Mean_veh	15.72	SE_veh	6.83	Mean_exp	30.83	SE_exp	6.41	Graphs			Unclear	yes	yes	yes
Peres et al.	2018	16		Rat	Sponetaneous Hyperactive	Male		CBD	0.5		P30-60	5	1	i.p.	Vehicle			Fear Conditioning		long-term	3	10	10	Yes	Mean_veh	16.0833	SE_veh	2.49	Mean_exp	26.3333	SE_exp	3.09667	Text		converted absolute time to percentage	Unclear	yes	yes	yes
Peres et al.	2018	17		Rat	Sponetaneous Hyperactive	Male		CBD	1		P30-60	5	1	i.p.	Vehicle			Fear Conditioning		long-term	3	10	10	Yes	Mean_veh	16.0833	SE_veh	2.49	Mean_exp	17.3333	SE_exp	1.72	Text		converted absolute time to percentage	Unclear	yes	yes	yes
Peres et al.	2018	18		Rat	Sponetaneous Hyperactive	Male		CBD	5		P30-60	5	1	i.p.	Vehicle			Fear Conditioning		long-term	3	10	10	Yes	Mean_veh	16.0833	SE_veh	2.49	Mean_exp	14.2933	SE_exp	0.983333	Text		converted absolute time to percentage	Unclear	yes	yes	yes
Frontera et al.	2018	1		Mouse	Wildtype	Male		WIN55,212–2	3		P30-35	5	1	s.c.	Vehicle			Open Field	Novelty-induced	short-term	1	18	21	Yes	Mean_veh	2726	SE_veh	126	Mean_exp	2169	SE_exp	87	Text		unit: cm	Yes	Unclear	Unclear	yes
Aguilar et al.	2018	1		Rat	Wildtype	Male		WIN55,212–2	0.2		P35-45	5	1	i.p.	Vehicle			Open Field	Novelty-induced	long-term	1	15	14	Yes	Mean_veh	1246.75	SE_veh	207.8	Mean_exp	805.19	SE_exp	259.14	Graphs			Unclear	Unclear	Unclear	yes
Aguilar et al.	2018	2		Rat	Wildtype	Male		WIN55,212–2	0.2		P35-45	5	1	i.p.	Vehicle			Open Field	Psychostimulant-induced	long-term	1	15	14	Yes	Mean_veh	5922.08	SE_veh	857.14	Mean_exp	4077.92	SE_exp	311.69	Graphs		following novelty-induced	Unclear	Unclear	Unclear	yes
Schoch et al.	2017	1		Rat	Wildtype	Male		WIN55,212–2	1.2		P30-44	5	1	i.p.	Vehicle			Open Field	Novelty-induced	long-term	1	8	8	Yes			SE_veh							unable to extract data from graph	data request sent
Kasten et al.	2017	1		Mouse	Wildtype	Male		THC	10	High	P28-44	4	1/3	i.p.	Vehicle	B6 mice		Open Field	Novelty-induced	long-term	1	9-10	9-10	Yes	Mean_veh	4421.05	SE_veh	280.7	Mean_exp	4280.7	SE_exp	245.62	Graphs			Unclear	Unclear	yes	Unclear
Kasten et al.	2017	2		Mouse	Wildtype	Male		THC	10	High	P28-44	4	1/3	i.p.	Vehicle	B6 mice		Memory Discrimination	Novel object	long-term	1	9-10	9-10	Yes	Mean_veh	0.27	SE_veh	0.05	Mean_exp	0.15	SE_exp	0.08	Graphs			Unclear	Unclear	yes	Unclear
Kasten et al.	2017	3		Mouse	Wildtype	Male		THC	10	High	P28-44	4	1/3	i.p.	Vehicle	D2 mice		Open Field	Novelty-induced	long-term	1	9-10	9-10	Yes	Mean_veh	4526.32	SE_veh	140.35	Mean_exp	4491.23	SE_exp	245.61	Graphs			Unclear	Unclear	yes	Unclear
Kasten et al.	2017	4		Mouse	Wildtype	Male		THC	10	High	P28-44	4	1/3	i.p.	Vehicle	D2 mice		Memory Discrimination	Novel object	long-term	1	9-10	9-10	Yes	Mean_veh	0.33	SE_veh	0.08	Mean_exp	0.17	SE_exp	0.13	Graphs			Unclear	Unclear	yes	Unclear
Tomas-Roig et al.	2016	1		Mouse	Wildtype	Male		WIN55,212–2	0.5		~P35-55	5	1	i.p.	Vehicle			Morris Water		long-term	3	15	15	No(specify)			SE_veh							No useful measure	distance. Not latency
Tomas-Roig et al.	2016	2		Mouse	Wildtype	Male		WIN55,212–2	1		~P35-55	5	1	i.p.	Vehicle			Morris Water		long-term	3	15	15	No(specify)			SE_veh							No useful measure	distance. Not latency
Tomas-Roig et al.	2016	3		Mouse	Wildtype	Male		WIN55,212–2	3		~P35-55	5	1	i.p.	Vehicle			Morris Water		long-term	3	15	15	No(specify)			SE_veh							No useful measure	distance. Not latency
Tomas-Roig et al.	2016	4		Mouse	Wildtype	Male		WIN55,212–2	0.5		~P35-55	5	1	i.p.	Vehicle			Open Field	Novelty-induced	long-term	3	15	15	No(specify)			SE_veh							No useful measure	no primary measure: total active time?
Tomas-Roig et al.	2016	5		Mouse	Wildtype	Male		WIN55,212–2	1		~P35-55	5	1	i.p.	Vehicle			Open Field	Novelty-induced	long-term	3	15	15	No(specify)			SE_veh							No useful measure	no primary measure
Tomas-Roig et al.	2016	6		Mouse	Wildtype	Male		WIN55,212–2	3		~P35-55	5	1	i.p.	Vehicle			Open Field	Novelty-induced	long-term	3	15	15	No(specify)			SE_veh							No useful measure	no primary measure
Tomas-Roig et al.	2016	7		Mouse	Wildtype	Male		WIN55,212–2	0.5		~P35-55	5	1	i.p.	Vehicle			Fear Conditioning		long-term	3	15	15	Yes	Mean_veh	38.05	SE_veh	2.48	Mean_exp	27.72	SE_exp	3.57	Graphs			Unclear	Unclear	Unclear	Unclear
Tomas-Roig et al.	2016	8		Mouse	Wildtype	Male		WIN55,212–2	1		~P35-55	5	1	i.p.	Vehicle			Fear Conditioning		long-term	3	15	15	Yes	Mean_veh	38.05	SE_veh	2.48	Mean_exp	23.44	SE_exp	4.18	Graphs			Unclear	Unclear	Unclear	Unclear
Tomas-Roig et al.	2016	9		Mouse	Wildtype	Male		WIN55,212–2	3		~P35-55	5	1	i.p.	Vehicle			Fear Conditioning		long-term	3	15	15	Yes	Mean_veh	38.05	SE_veh	2.48	Mean_exp	14.8	SE_exp	3.48	Graphs			Unclear	Unclear	Unclear	Unclear
Renard et al.	2017	1		Rat	Wildtype	N/A		THC	2.5-5-10	Escalating	P35-45	5	2	i.p.	Vehicle			Open Field	Novelty-induced	long-term	1	11	12	Yes	Mean_veh	4887.73	SE_veh	454.31	Mean_exp	2475.2	SE_exp	250.65	Graphs			Unclear	Unclear	yes	yes
Renard et al.	2017	2		Rat	Wildtype	N/A		THC	2.5-5-10	Escalating	P35-45	5	2	i.p.	Vehicle			Social Interaction	Social motivation	long-term	1	12	12	No(specify)	Mean_veh	76.97	SE_veh	2.96	Mean_exp	62.17	SE_exp	7.7	Graphs		investigation ratio, not index	Unclear	Unclear	yes	yes
Renard et al.	2017	3		Rat	Wildtype	N/A		THC	2.5-5-10	Escalating	P35-45	5	2	i.p.	Vehicle			Social Interaction	Social preference	long-term	1	12	12	No(specify)	Mean_veh	73.42	SE_veh	3.85	Mean_exp	50.63	SE_exp	5.32	Graphs		investigation ratio, not index	Unclear	Unclear	yes	yes
Renard et al.	2017	4		Rat	Wildtype	N/A		THC	2.5-5-10	Escalating	P35-45	5	2	i.p.	Vehicle			Memory Discrimination	Novel object	long-term	1	10	9	No(specify)	Mean_veh	63.91	SE_veh	3.44	Mean_exp	52.76	SE_exp	3.22	Graphs		investigation ratio, not index	Unclear	Unclear	yes	yes
Murphy et al.	2017	1		Mouse	Wildtype	Male		THC+CBD	3+3	Middle	P28-48	4	1	i.p.	Vehicle			Open Field	Novelty-induced	short-term	3	9	11	Yes	Mean_veh	901.3	SE_veh	123.7	Mean_exp	944.4	SE_exp	82.95	Author contacted			Yes	Unclear	Unclear	No
Murphy et al.	2017	2		Mouse	Wildtype	Male		THC+CBD	3+3	Middle	P28-48	4	1	i.p.	Vehicle			Memory Discrimination	Novel object	short-term	3	9	11	Yes	Mean_veh	0.4729	SE_veh	0.03407	Mean_exp	0.3109	SE_exp	0.0221	Author contacted			Yes	Unclear	Unclear	No
Murphy et al.	2017	3		Mouse	Wildtype	Male		CBD	3		P28-48	4	1	i.p.	Vehicle			Open Field	Novelty-induced	short-term	3	9	11	Yes	Mean_veh	901.3	SE_veh	123.7	Mean_exp	692.7	SE_exp	57.97	Author contacted			Yes	Unclear	Unclear	No
Murphy et al.	2017	4		Mouse	Wildtype	Male		CBD	3		P28-48	4	1	i.p.	Vehicle			Memory Discrimination	Novel object	short-term	3	9	11	Yes	Mean_veh	0.4729	SE_veh	0.03407	Mean_exp	0.4762	SE_exp	0.04691	Author contacted			Yes	Unclear	Unclear	No
Murphy et al.	2017	5		Mouse	Wildtype	Male		THC	3	Middle	P28-48	4	1	i.p.	Vehicle			Open Field	Novelty-induced	short-term	3	9	11	Yes	Mean_veh	901.3	SE_veh	123.7	Mean_exp	817.8	SE_exp	63.19	Author contacted			Yes	Unclear	Unclear	No
Murphy et al.	2017	6		Mouse	Wildtype	Male		THC	3	Middle	P28-48	4	1	i.p.	Vehicle			Memory Discrimination	Novel object	short-term	3	9	10	Yes	Mean_veh	0.4729	SE_veh	0.03407	Mean_exp	-0.1914	SE_exp	0.05702	Author contacted			Yes	Unclear	Unclear	No
Murphy et al.	2017	7		Mouse	Wildtype	Male		THC+CBD	3+3	Middle	P28-48	4	1	i.p.	Vehicle			Open Field	Novelty-induced	long-term	3	9	11	Yes	Mean_veh	930.1	SE_veh	131	Mean_exp	990.7	SE_exp	102.4	Author contacted			Yes	Unclear	Unclear	No
Murphy et al.	2017	8		Mouse	Wildtype	Male		THC+CBD	3+3	Middle	P28-48	4	1	i.p.	Vehicle			Memory Discrimination	Novel object	long-term	3	9	11	Yes	Mean_veh	0.5211	SE_veh	0.0544	Mean_exp	0.5597	SE_exp	0.03964	Author contacted			Yes	Unclear	Unclear	No
Murphy et al.	2017	9		Mouse	Wildtype	Male		CBD	3		P28-48	4	1	i.p.	Vehicle			Open Field	Novelty-induced	long-term	3	9	11	Yes	Mean_veh	930.1	SE_veh	131	Mean_exp	720.6	SE_exp	51.32	Author contacted			Yes	Unclear	Unclear	No
Murphy et al.	2017	10		Mouse	Wildtype	Male		CBD	3		P28-48	4	1	i.p.	Vehicle			Memory Discrimination	Novel object	long-term	3	9	11	Yes	Mean_veh	0.5211	SE_veh	0.0544	Mean_exp	0.5248	SE_exp	0.05072	Author contacted			Yes	Unclear	Unclear	No
Murphy et al.	2017	11		Mouse	Wildtype	Male		THC	3	Middle	P28-48	4	1	i.p.	Vehicle			Open Field	Novelty-induced	long-term	3	9	11	Yes	Mean_veh	930.1	SE_veh	131	Mean_exp	690.5	SE_exp	71.93	Author contacted			Yes	Unclear	Unclear	No
Murphy et al.	2017	12		Mouse	Wildtype	Male		THC	3	Middle	P28-48	4	1	i.p.	Vehicle			Memory Discrimination	Novel object	long-term	3	9	11	Yes	Mean_veh	0.5211	SE_veh	0.0544	Mean_exp	-0.4951	SE_exp	0.07077	Author contacted			Yes	Unclear	Unclear	No
Segal-Gavish et al.	2017	1		Mouse	DN-DISC1	Male		THC	10	High	P42-51	6	1	i.p.	Vehicle			Open Field	Novelty-induced	short-term	1	9	10	Yes	Mean_veh	3034.93	SE_veh	109.17	Mean_exp	2849.34	SE_exp	152.84	Graphs			Unclear	Unclear	Unclear	yes
Segal-Gavish et al.	2017	2		Mouse	DN-DISC1	Male		THC	10	High	P42-51	6	1	i.p.	Vehicle			Memory Discrimination	Novel object	short-term	1	9	10	No(specify)	Mean_veh	58.91	SE_veh	3.01	Mean_exp	35.48	SE_exp	7.7	Graphs		investigation ratio, not index	Unclear	Unclear	Unclear	yes
Segal-Gavish et al.	2017	3		Mouse	Wildtype	Male		THC	10	High	P42-51	6	1	i.p.	Vehicle			Open Field	Novelty-induced	short-term	1	11	11	Yes	Mean_veh	4126.64	SE_veh	218.34	Mean_exp	3886.46	SE_exp	152.84	Graphs			Unclear	Unclear	Unclear	yes
Segal-Gavish et al.	2017	4		Mouse	Wildtype	Male		THC	10	High	P42-51	6	1	i.p.	Vehicle			Memory Discrimination	Novel object	short-term	1	11	11	No(specify)	Mean_veh	58.24	SE_veh	4.69	Mean_exp	63.26	SE_exp	6.7	Graphs		investigation ratio, not index	Unclear	Unclear	Unclear	yes
Aguilar et al.	2017	1		Mouse	Wildtype	Male		WIN55,212–2	0.5		P34-47	5	1	i.p.	Vehicle			Open Field	Novelty-induced	long-term	1	10	10	Yes	Mean_veh	3295.96	SE_veh	112.11	Mean_exp	3228.7	SE_exp	179.37	Graphs			Unclear	Unclear	Unclear	Unclear
Aguilar et al.	2017	2		Mouse	Wildtype	Male		WIN55,212–2	0.5		P34-47	5	1	i.p.	Vehicle			Prepulse Inhibition		long-term	1	10	10	Yes	Mean_veh	70.38	SE_veh	5.57	Mean_exp	-83.54	SE_exp	22.78	Graphs			Unclear	Unclear	Unclear	Unclear
Aguilar et al.	2017	3		Mouse	Wildtype	Male		WIN55,212–2	0.5		P34-47	5	1	i.p.	Vehicle			Memory Discrimination	Novel object	long-term	1	10	10	Yes	Mean_veh	29.86	SE_veh	2.19	Mean_exp	22.02	SE_exp	2.76	Graphs			Unclear	Unclear	Unclear	Unclear
Kevin et al.	2017	1		Rat	Wildtype	Male		AB-PINACA	1 & 5		P31-55	5	1/2	i.p.	Vehicle	6 low + 6 high dose		Memory Discrimination	Novel object	long-term	3	16	16	No(specify)	Mean_veh	51.36	SE_veh	3.19	Mean_exp	23.18	SE_exp	4.55	Graphs		investigation ratio, not index, 60min inter-trial interval	Unclear	yes	yes	yes
Kevin et al.	2017	2		Rat	Wildtype	Male		AB-FUBINACA	0.2 &1		P31-55	5	1/2	i.p.	Vehicle	6 low + 6 high dose		Memory Discrimination	Novel object	long-term	3	16	16	No(specify)	Mean_veh	51.36	SE_veh	3.19	Mean_exp	25	SE_exp	3.64	Graphs		investigation ratio, not index, 60min inter-trial interval	Unclear	yes	yes	yes
Kevin et al.	2017	3		Rat	Wildtype	Male		THC	0.2 &1	Low	P31-55	5	1/2	i.p.	Vehicle	6 low + 6 high dose		Memory Discrimination	Novel object	long-term	3	16	16	No(specify)	Mean_veh	51.36	SE_veh	3.19	Mean_exp	30	SE_exp	5	Graphs		investigation ratio, not index, 60min inter-trial interval	Unclear	yes	yes	yes
Kevin et al.	2017	4		Rat	Wildtype	Male		AB-PINACA	1 & 5		P31-55	5	1/2	i.p.	Vehicle	6 low + 6 high dose		Open Field	Novelty-induced	long-term	3	16	16	Yes	Mean_veh	44.4	SE_veh	2.7	Mean_exp	41.2	SE_exp	1.6	Text		60min inter-trial interval	Unclear	yes	yes	yes
Kevin et al.	2017	5		Rat	Wildtype	Male		AB-FUBINACA	0.2 &1		P31-55	5	1/2	i.p.	Vehicle	6 low + 6 high dose		Open Field	Novelty-induced	long-term	3	16	16	Yes	Mean_veh	44.4	SE_veh	2.7	Mean_exp	41.1	SE_exp	1.7	Text		60min inter-trial interval	Unclear	yes	yes	yes
Kevin et al.	2017	6		Rat	Wildtype	Male		THC	0.2 &1	Low	P31-55	5	1/2	i.p.	Vehicle	6 low + 6 high dose		Open Field	Novelty-induced	long-term	3	16	16	Yes	Mean_veh	44.4	SE_veh	2.7	Mean_exp	39.9	SE_exp	2.2	Text		60min inter-trial interval	Unclear	yes	yes	yes
Kirschmann et al.	2017	1		Rat	Wildtype	Male		WIN55,212–2	1.2		P34-54	5	1	i.p.	Other	Sucrose		Memory Discrimination	Novel object location	long-term	1			No(specify)			SE_veh							No useful measure	No primary measure
Kirschmann et al.	2017	2		Rat	Wildtype	Male		WIN55,212–2	1.2		P34-54	5	1	i.p.	Other	Sucrose		Memory Discrimination	Novel object	long-term	1			No(specify)			SE_veh							No useful measure	No primary measure
Renard et al.	2017	1		Rat	Wildtype	Male		THC	2.5-5-10	Escalating	P35-45	5	2	i.p.	Vehicle			Social Interaction	Social motivation	long-term	1	8	9	No(specify)	Mean_veh		SE_veh		Mean_exp		SE_exp		Graphs	veh control data		Unclear	Unclear	yes	yes
Renard et al.	2017	2		Rat	Wildtype	Male		THC	2.5-5-10	Escalating	P35-45	5	2	i.p.	Vehicle			Social Interaction	Social preference	long-term	1	8	9	Yes	Mean_veh	115.51±17.96	SE_veh	53.88±8.98	Mean_exp	90.2±13.07	SE_exp	59.59±10.21	Graphs		investigation time	Unclear	Unclear	yes	yes
Renard et al.	2017	3		Rat	Wildtype	Male		THC	2.5-5-10	Escalating	P35-45	5	2	i.p.	Vehicle			Open Field	Novelty-induced	long-term	1	9	9	Yes	Mean_veh	3760.17	SE_veh	434.75	Mean_exp	2417.8	SE_exp	366.1	Graphs			Unclear	Unclear	yes	yes
Renard et al.	2017	4		Rat	Wildtype	Male		THC	2.5-5-10	Escalating	P35-45	5	2	i.p.	Vehicle			Prepulse Inhibition		long-term	1	8	9	Yes	Mean_veh	86.32	SE_veh	1.47	Mean_exp	74.92	SE_exp	2.93	Graphs			Unclear	Unclear	yes	yes
Silva et al.	2016	1		Rat	Wildtype	Male		THC	3	Middle	P29-38	5	1	i.p.	Vehicle			Prepulse Inhibition		long-term		10-14	10-14	No(specify)			SE_veh							No useful measure
Silva et al.	2016	2		Rat	Wildtype	Female		THC	3	Middle	P29-38	5	1	i.p.	Vehicle			Prepulse Inhibition		long-term		10-14	10-14	No(specify)			SE_veh							No useful measure
Zamberletti et al.	2016	1		Rat	Wildtype	Male		THC	2.5-5-10	Escalating	P35-45	5	2	i.p.	Vehicle			Memory Discrimination	Novel object	long-term	1	8	8	Yes	Mean_veh	41.04	SE_veh	8.82	Mean_exp	25.83	SE_exp	12.1	Graphs		classic NOR	Unclear	yes	yes	Unclear
Zamberletti et al.	2016	2		Rat	Wildtype	Male		THC	2.5-5-10	Escalating	P35-45	5	2	i.p.	Vehicle			Open Field	Novelty-induced	long-term	1	8	8	Yes	Mean_veh	688.27	SE_veh	151.24	Mean_exp	543.21	SE_exp	74.07	Graphs			Unclear	yes	yes	Unclear
Alteba et al	2016	1		Rat	Wildtype	Male		WIN55,212–2	1.2		P45-60	7	1	i.p.	Vehicle			Memory Discrimination	Novel object	long-term	1	8	8	No(specify)	Mean_veh	0.56	SE_veh	0.04	Mean_exp	0.59	SE_exp	0.02	Graphs		investigation ratio, not index	Yes	yes	yes	Unclear
Alteba et al	2016	2		Rat	Wildtype	Male		WIN55,212–2	1.2		P45-60	7	1	i.p.	Vehicle			Memory Discrimination	Novel object location	long-term	1	8	8	No(specify)	Mean_veh	0.65	SE_veh	0.02	Mean_exp	0.59	SE_exp	0.04	Graphs		investigation ratio, not index	Yes	yes	yes	Unclear
Alteba et al	2016	3		Rat	Wildtype	Male		WIN55,212–2	1.2		P45-60	7	1	i.p.	Vehicle			Social Interaction	Social preference	long-term	1	8	8	No(specify)	Mean_veh	56.38	SE_veh	1.88	Mean_exp	59.46	SE_exp	1.77	Graphs		investigation ratio, not index	Yes	yes	yes	Unclear
Alteba et al	2016	4		Rat	Wildtype	Male		WIN55,212–2	1.2		P45-60	7	1	i.p.	Vehicle			Open Field	Novelty-induced	long-term	1	8	8	No(specify)	Mean_veh	91.22	SE_veh	6.74	Mean_exp	81.65	SE_exp	6.12	Graphs		total iline crossing	Yes	yes	yes	Unclear
Alteba et al	2016	5		Rat	Wildtype	Female		WIN55,212–2	1.2		P45-60	7	1	i.p.	Vehicle			Memory Discrimination	Novel object	long-term	1	8	8	No(specify)	Mean_veh	0.63	SE_veh	0.04	Mean_exp	0.64	SE_exp	0.04	Graphs		investigation ratio, not index	Yes	yes	yes	Unclear
Alteba et al	2016	6		Rat	Wildtype	Female		WIN55,212–2	1.2		P45-60	7	1	i.p.	Vehicle			Memory Discrimination	Novel object location	long-term	1	8	8	No(specify)	Mean_veh	0.57	SE_veh	0.02	Mean_exp	0.59	SE_exp	0.03	Graphs		investigation ratio, not index	Yes	yes	yes	Unclear
Alteba et al	2016	7		Rat	Wildtype	Female		WIN55,212–2	1.2		P45-60	7	1	i.p.	Vehicle			Social Interaction	Social preference	long-term	1	8	8	No(specify)	Mean_veh	53.49	SE_veh	1.53	Mean_exp	56.49	SE_exp	1.7	Graphs		investigation ratio, not index	Yes	yes	yes	Unclear
Alteba et al	2016	8		Rat	Wildtype	Female		WIN55,212–2	1.2		P45-60	7	1	i.p.	Vehicle			Open Field	Novelty-induced	long-term	1	8	8	No(specify)	Mean_veh	68.88	SE_veh	8.67	Mean_exp	83.61	SE_exp	6.35	Graphs		total iline crossing	Yes	yes	yes	Unclear
Abboussi et al.	2016	1		Rat	Wildtype	Male		WIN55,212–2	1		~P28-48	4	1-2	i.p.	Vehicle			Open Field	Novelty-induced	long-term	1	10	11	No(specify)	Mean_veh	43.65	SE_veh	3.23	Mean_exp	34.41	SE_exp	3.47	Graphs		total squares visited	Unclear	Unclear	Unclear	Unclear
Abboussi et al.	2016	2		Rat	Wildtype	Male		WIN55,212–2	1		~P28-48	4	1-2	i.p.	Vehicle			Memory Discrimination	Novel object	long-term	1	10	11	Yes	Mean_veh	0.47	SE_veh	0.04	Mean_exp	-0.06	SE_exp	-0.06	Graphs			Unclear	Unclear	Unclear	Unclear
Scherma et al.	2016	1		Rat	Wildtype	Male		THC	2.5-5-10	Escalating	P45-55	7	2	i.p.	Vehicle			Open Field		long-term	1	8	8	Yes	t	0.1767	df	14					Text			Unclear	yes	Unclear	Unclear
Scherma et al.	2016	2		Rat	Wildtype	Male		THC	2.5-5-10	Escalating	P45-55	7	2	i.p.	Vehicle			Prepulse Inhibition		long-term	1	8	8	Yes	t	1.179	df	14					Text			Unclear	yes	Unclear	Unclear
Scherma et al.	2016	3		Rat	Wildtype	Male		THC	2.5-5-10	Escalating	P45-55	7	2	i.p.	Vehicle			Sucrose Preference		long-term	1	8	8	Yes	Mean_veh	98.01	SE_veh	0.19	Mean_exp	94.22	SE_exp	1.56	Graphs			Unclear	yes	Unclear	Unclear
Zamberletti et al.	2016	1		Rat	Wildtype	Female		THC	2.5-5-10	Escalating	P35-45	5	2	i.p.	Vehicle			Memory Discrimination	Novel object	long-term	1	6	6	Yes	Mean_veh	34.24	SE_veh	8.59	Mean_exp	-13.96	SE_exp	-10.53	Graphs			Unclear	unclear	Unclear	Unclear
Ballinger et al.	2015	1		Mouse	DN-DISC1	Male		THC	8	High	P28-48	4	1	s.c.	Vehicle			Memory Alternation	Y maze	long-term	1	10	10	Yes	Mean_veh	56.69	SE_veh	9.14	Mean_exp	61.07	SE_exp	6.08	Graphs			Unclear	yes	Unclear	yes
Ballinger et al.	2015	2		Mouse	DN-DISC1	Male		THC	8	High	P28-48	4	1	s.c.	Vehicle			Memory Discrimination	Novel object	long-term	1	10	10	No(specify)	Mean_veh	60.6	SE_veh	8.51	Mean_exp	59.42	SE_exp	8.93	Graphs		investigation ratio, not index	Unclear	yes	Unclear	yes
Ballinger et al.	2015	3		Mouse	Wildtype	Male		THC	8	High	P28-48	4	1	s.c.	Vehicle			Memory Alternation	Y maze	long-term	1	10	10	Yes	Mean_veh	58.41	SE_veh	4.62	Mean_exp	58.14	SE_exp	4.62	Graphs			Unclear	yes	Unclear	yes
Ballinger et al.	2015	4		Mouse	Wildtype	Male		THC	8	High	P28-48	4	1	s.c.	Vehicle			Memory Discrimination	Novel object	long-term	1	10	10	No(specify)	Mean_veh	59.03	SE_veh	6.99	Mean_exp	59.03	SE_exp	8.93	Graphs		investigation ratio, not index	Unclear	yes	Unclear	yes
Ballinger et al.	2015	5		Mouse	Wildtype	Male		THC	8	High	P28-48	4	1	s.c.	Vehicle			Fear Conditioning		long-term	1	10	10	Yes	Mean_veh	38.06	SE_veh	5.67	Mean_exp	33.61	SE_exp	5.52	Graphs			Unclear	yes	Unclear	yes
Ballinger et al.	2015	6		Mouse	DN-DISC1	Male		THC	8	High	P28-48	4	1	s.c.	Vehicle			Fear Conditioning		long-term	1	10	10	Yes	Mean_veh	20.87	SE_veh	2.61	Mean_exp	14.88	SE_exp	3.07	Graphs			Unclear	yes	Unclear	yes
Keeley et al.	2015	1		Rat	Wildtype	Male		THC	5	Middle	puberty onset	6	1	i.p.	Vehicle			Morris Water						No(specify)			SE_veh							No useful measure	distance. Not latency
Keeley et al.	2015	2		Rat	Wildtype	Female		THC	5	Middle	puberty onset	6	1	i.p.	Vehicle			Morris Water						No(specify)			SE_veh							No useful measure	distance. Not latency
Keeley et al.	2015	3		Rat	Wildtype	Male		THC	5	Middle	puberty onset	6	1	i.p.	Vehicle	WR		Fear Conditioning		long-term	1	8	8	Yes	Mean_veh	13.72	SE_veh	3.96	Mean_exp	18.8	SE_exp	4.16	Graphs		equivalent week of puberty onset according to DOI:10.17179/excli2021-4072	Unclear	Unclear	Unclear	yes
Keeley et al.	2015	4		Rat	Wildtype	Male		THC	5	Middle	puberty onset	6	1	i.p.	Vehicle	LER		Fear Conditioning		long-term	1	8	8	Yes	Mean_veh	21.52	SE_veh	3.98	Mean_exp	21.52	SE_exp	3.65	Graphs		equivalent week of puberty onset according to DOI:10.17179/excli2021-4072	Unclear	Unclear	Unclear	yes
Keeley et al.	2015	5		Rat	Wildtype	Female		THC	5	Middle	puberty onset	6	1	i.p.	Vehicle	WR		Fear Conditioning		long-term	1	8	8	Yes	Mean_veh	18.87	SE_veh	4.48	Mean_exp	14.38	SE_exp	3.96	Graphs		equivalent week of puberty onset according to DOI:10.17179/excli2021-4072	Unclear	Unclear	Unclear	yes
Keeley et al.	2015	6		Rat	Wildtype	Female		THC	5	Middle	puberty onset	6	1	i.p.	Vehicle	LER		Fear Conditioning		long-term	1	8	8	Yes	Mean_veh	15.23	SE_veh	3.98	Mean_exp	18.21	SE_exp	3.64	Graphs		equivalent week of puberty onset according to DOI:10.17179/excli2021-4072	Unclear	Unclear	Unclear	yes
Rubino T et al.	2015	1		Rat	Wildtype	Female		THC	2.5-5-10	Escalating	P35-45	5	2	i.p.	Vehicle			Memory Alternation	T maze	long-term	1	4	4	Yes	Mean_veh	93.75	SE_veh	1.75	Mean_exp	62.5	SE_exp	12.14	Text	sample sizes obtained from author		Unclear	Unclear	Unclear	yes
Cadoni et al.	2015	1		Rat	Wildtype	Male		THC	2-4-8	Escalating	P43-45	7	2	i.p.	Vehicle			Memory Alternation	Y maze	long-term		9-10	9-10	Yes	Mean_veh	68.09	SE_veh	4.99	Mean_exp	58.12	SE_exp	4.84	Graphs			Unclear	Unclear	yes	yes
Cadoni et al.	2015	2		Rat	Wildtype	Male		THC	2-4-8	Escalating	P43-45	7	2	i.p.	Vehicle	F344		Memory Discrimination	Novel object	long-term	1	9-10	9-10	No(specify)	Mean_veh	55.86	SE_veh	7.8	Mean_exp	64.56	SE_exp	5.11	Graphs		investigation ratio, not index	Unclear	Unclear	yes	yes
Cadoni et al.	2013	3		Rat	Wildtype	Male		THC	2-4-8	Escalating	P43-45	7	2	i.p.	Vehicle	Lew		Memory Alternation	Y maze	long-term		9-10	9-10	Yes	Mean_veh	63.25	SE_veh	3.99	Mean_exp	65.24	SE_exp	2	Graphs			Unclear	Unclear	yes	yes
Cadoni et al.	2013	4		Rat	Wildtype	Male		THC	2-4-8	Escalating	P43-45	7	2	i.p.	Vehicle			Memory Discrimination	Novel object	long-term	1	9-10	9-10	No(specify)	Mean_veh	63.66	SE_veh	5.86	Mean_exp	65.77	SE_exp	4.8	Graphs		investigation ratio, not index	Unclear	Unclear	yes	yes
Gomes et al.	2015	1		Rat	Wildtype	Male		WIN55,212–2	1.2		P40-65	6	irregular, 20 injections	i.p.	Vehicle			Set Shifting		long-term	1	8-9	8-9	Yes	Mean_veh	9.37	SE_veh	0.88	Mean_exp	10.57	SE_exp	1.5	Graphs			Unclear	yes	Unclear	Unclear
Gomes et al.	2015	2		Rat	Wildtype	Male		WIN55,212–2	1.2		P40-65	6	irregular, 20 injections	i.p.	Vehicle			Open Field	Psychostimulant-induced	long-term							SE_veh								not enough number of studies	Unclear	yes	Unclear	Unclear
Bortolato et al.	2014	1		Rat	Wildtype	Male		THC	1	Low	P35-48	5	1	i.p.	Vehicle			Prepulse Inhibition		long-term	1	8-12	8-12	Yes	t	0.48	df	28					Text			Unclear	yes	yes	yes
Bortolato et al.	2014	2		Rat	Wildtype	Male		THC	1	Low	P35-48	5	1	i.p.	Vehicle			Memory Discrimination	Novel object	long-term	1	15	15	No(specify)			SE_veh								No primary measure	Unclear	yes	yes	yes
Abboussi et al.	2014	1		Rat	Wildtype	Male		WIN55,212–2	1		P27-30	4	1	i.p.	Vehicle			Morris Water		long-term	1	10	10	Yes	Mean_veh	6.29	SE_veh	0.54	Mean_exp	11.79	SE_exp	1.14	Graphs			Unclear	unclear	yes
Zamberletti et al.	2014	1		Rat	Wildtype	Female		THC	2.5-5-10	Escalating	P35-45	5	2	i.p.	Vehicle			Memory Discrimination	Novel object	long-term	1	6	6	Yes	Mean_veh	27.91	SE_veh	3.56	Mean_exp	0.16	SE_exp	6.2	Graphs			Unclear	yes	yes	Unclear
Zamberletti et al.	2014	2		Rat	Wildtype	Female		THC	2.5-5-10	Escalating	P35-45	5	2	i.p.	Vehicle			Open Field	Novelty-induced	long-term	1	6	6	No(specify)	Mean_veh	352.27	SE_veh	28.41	Mean_exp	443.18	SE_exp	11.37	Graphs		beam breaks, at 50min	Unclear	yes	yes	Unclear
Llorente-Berzal et al.	2013	1		Rat	Wildtype	Male		THC	2.5-5-10	Escalating	P28-45	4	1	i.p.	Vehicle			Open Field	Novelty-induced	long-term	1	16	16	Yes	Mean_veh	11.82	SE_veh	1.21	Mean_exp	11.87	SE_exp	1.24	Text		unit: m	Unclear	Unclear	Unclear	yes
Llorente-Berzal et al.	2013	2		Rat	Wildtype	Male		THC	2.5-5-10	Escalating	P28-45	4	1	i.p.	Vehicle			Memory Discrimination	Novel object	long-term	1	15	15	Yes	Mean_veh	0.26	SE_veh	0.05	Mean_exp	0.28	SE_exp	0.05	Graphs			Unclear	Unclear	Unclear	yes
Llorente-Berzal et al.	2013	3		Rat	Wildtype	Male		THC	2.5-5-10	Escalating	P28-45	4	1	i.p.	Vehicle			Prepulse Inhibition		long-term	1	16	16	Yes	Mean_veh	35.97	SE_veh	4.42	Mean_exp	45.97	SE_exp	3.12	Graphs			Unclear	Unclear	Unclear	yes
Llorente-Berzal et al.	2013	4		Rat	Wildtype	Female		THC	2.5-5-10	Escalating	P28-45	4	1	i.p.	Vehicle			Open Field	Novelty-induced	long-term	1	16	16	Yes	Mean_veh	28.96	SE_veh	3.38	Mean_exp	39.94	SE_exp	3.5	Text			Unclear	Unclear	Unclear	yes
Llorente-Berzal et al.	2013	5		Rat	Wildtype	Female		THC	2.5-5-10	Escalating	P28-45	4	1	i.p.	Vehicle			Memory Discrimination	Novel object	long-term	1	15	16	Yes	Mean_veh	35.97	SE_veh	4.42	Mean_exp	45.97	SE_exp	3.12	Graphs			Unclear	Unclear	Unclear	yes
Llorente-Berzal et al.	2013	6		Rat	Wildtype	Female		THC	2.5-5-10	Escalating	P28-45	4	1	i.p.	Vehicle			Prepulse Inhibition		long-term	1	16	16	Yes	Mean_veh	28.96	SE_veh	3.38	Mean_exp	39.94	SE_exp	3.5	Graphs			Unclear	Unclear	Unclear	yes
Raver et al.	2013	1		Mouse	Wildtype	Male		WIN55,212–2	1		P35-55	5	1	i.p.	Vehicle			Memory Discrimination	Novel object	long-term	1	7	8	Yes	%Familiar_veh±SE	29.6 ± 5.1	SE_veh	70.4 ± 5.1	%Familiar_exp±SE	48.8 ± 4.54	%Novel_exp±SE	51.2 ± 4.5	Text		mean % time with either objects	Unclear	yes	yes	yes
Abush et al.	2013	1		Rat	Wildtype	Male		WIN55,212–2	1.2		P45-60	7	1	i.p.	Vehicle			Memory Discrimination	Novel object	long-term	1	8	7	No(specify)	Mean_veh	68.57	SE_veh	1.58	Mean_exp	62.23	SE_exp	2.03	Graphs		investigation ratio, not index	Unclear	Unclear	Unclear	yes
Abush et al.	2013	2		Rat	Wildtype	Male		WIN55,212–2	1.2		P45-60	7	1	i.p.	Vehicle			Memory Discrimination	Novel object location	long-term	1	8	8	No(specify)	Mean_veh	63.63	SE_veh	4.06	Mean_exp	56.15	SE_exp	2.75	Graphs		investigation ratio, not index	Unclear	Unclear	Unclear	yes
Abush et al.	2013	3		Rat	Wildtype	Male		WIN55,212–2	1.2		P45-60	7	1	i.p.	Vehicle			Open Field	Novelty-induced	long-term	1	8	8	Yes	Mean_veh	1307.46	SE_veh	107.47	Mean_exp	1659.7	SE_exp	65.67	Graphs			Unclear	Unclear	Unclear	yes
Schulz S et al.	2013	1		Rat	Wildtype	Male		WIN55,212–2	1.2		P40-65	6	irregular, 20 injections	i.p.	Vehicle			Open Field	Novelty-induced	long-term	1	12	12	Yes	Mean_veh	20.97	SE_veh	2.02	Mean_exp	20.05	SE_exp	1.58	Text		unit: m; 11d after	Unclear	Unclear	Unclear	Unclear
Schulz S et al.	2013	2		Rat	Wildtype	Male		WIN55,212–2	1.2		P40-65	6	irregular, 20 injections	i.p.	Vehicle			Memory Discrimination	Novel object	long-term	1	12	12	Yes	Familiar_veh±SE	38.7±10.63	SE_veh	61.36±10.03	Familiar_exp±SE	31.28±6.42	Novel_exp±SE	41.71±5.21	Graphs		unit: s; tested 39d after	Unclear	Unclear	Unclear	Unclear
Schulz S et al.	2013	3		Rat	Wildtype	Male		WIN55,212–2	1.2		P40-65	6	irregular, 20 injections	i.p.	Vehicle			Open Field	Novelty-induced	long-term	1	12	12	Yes	Mean_veh	25.18	SE_veh	2.23	Mean_exp	23.58	SE_exp	2.36	Text		unit: m; 39d after	Unclear	Unclear	Unclear	Unclear
Renard et al.	2013	1		Rat	Wildtype	Male		CP55,940	0.15-0.2-0.3	Escalating	P29-49	5	1	i.p.	Vehicle	wistar		Memory Discrimination	Novel object	long-term	1	12	11	Yes	Familiar_veh±SE	9.27±1.13	SE_veh	20.63±1.75	Familiar_exp±SE	8.39±1.05	Novel_exp±SE	19.58±2.62	Graphs			Unclear	No	Unclear	yes
Renard et al.	2013	2		Rat	Wildtype	Male		CP55,940	0.15-0.2-0.3	Escalating	P29-49	5	1	i.p.	Vehicle	wistar		Memory Discrimination	Novel object location	long-term	1	12	11	Yes	Familiar_veh±SE	9.32±1.05	SE_veh	20.56±1.83	Familiar_exp±SE	8.45±0.96	Novel_exp±SE	19.6±2.61	Graphs			Unclear	No	Unclear	yes
Renard et al.	2013	3		Rat	Wildtype	Male		CP55,940	0.15-0.2-0.3	Escalating	P29-49	5	1	i.p.	Vehicle	lister hooded		Memory Discrimination	Novel object	long-term	1	10	11	Yes	Familiar_veh±SE	10.87±0.97	SE_veh	21.91±1.41	Familiar_exp±SE	8.83±0.8	Novel_exp±SE	17.4±2.03	Graphs			Unclear	No	Unclear	yes
Renard et al.	2013	4		Rat	Wildtype	Male		CP55,940	0.15-0.2-0.3	Escalating	P29-49	5	1	i.p.	Vehicle	lister hooded		Memory Discrimination	Novel object location	long-term	1	12	12	Yes	Familiar_veh±SE	10.9±0.95	SE_veh	21.95±1.45	Familiar_exp±SE	8.87±0.8	Novel_exp±SE	17.44±2.04	Graphs			Unclear	No	Unclear	yes
Long et al.	2013	1		Mouse	Nrg1 +/-	Male		THC	10	High	~P31-50	5	1	i.p.	Vehicle			Open Field	Novelty-induced	short-term	1	12-16	12-16	Yes	Mean_veh	3314.92	SE_veh	209.94	Mean_exp	2659.28	SE_exp	143.65	Graphs			Unclear	Unclear	Unclear	Unclear
Long et al.	2013	2		Mouse	Nrg1 +/-	Male		THC	10	High	~P31-50	5	1	i.p.	Vehicle			Prepulse Inhibition		short-term	1	12-16	12-16	Yes	Mean_veh	39.78	SE_veh	3.7	Mean_exp	41.6	SE_exp	3.57	Graphs		at 82db	Unclear	Unclear	Unclear	Unclear
Long et al.	2013	3		Mouse	Wildtype	Male		THC	10	High	~P31-50	5	1	i.p.	Vehicle			Open Field	Novelty-induced	short-term	2	12-16	12-16	Yes	Mean_veh	2470.91	SE_veh	221.61	Mean_exp	2171.75	SE_exp	155.12	Graphs			Unclear	Unclear	Unclear	Unclear
Long et al.	2013	4		Mouse	Wildtype	Male		THC	10	High	~P31-50	5	1	i.p.	Vehicle			Prepulse Inhibition		short-term	2	12-16	12-16	Yes	Mean_veh	37.82	SE_veh	4.62	Mean_exp	33.93	SE_exp	3.89	Graphs			Unclear	Unclear	Unclear	Unclear
Gleason et al.	2012	1		Mouse	Wildtype	N/A		WIN55,212–2	2		P30-39	5	1	i.p.	Vehicle			Prepulse Inhibition		long-term	1	10	10	Yes	t	2.2	df	18					Text			Unclear	yes	yes	yes
Gleason et al.	2012	2		Mouse	Wildtype	N/A		WIN55,212–2	2		P30-39	5	1	i.p.	Vehicle			Open Field	Novelty-induced	long-term				No(specify)			SE_veh							unable to extract data from graph, data request sent	beam breaks	Unclear	yes	yes	yes
Gleason et al.	2012	3		Mouse	Wildtype	N/A		WIN55,212–2	2		P30-39	5	1	i.p.	Vehicle			Fear Conditioning		long-term	1	10	10	Yes	Mean_veh	22.72	SE_veh	2.03	Mean_exp	14.1	SE_exp	2.27	Graphs			Unclear	yes	yes	yes
O’Tuathaigh et al.	2012	1		Mouse	COMT -/-	Male		WIN55,212–2	2.5		P32-52	5	1	i.p.	Vehicle			Prepulse Inhibition		long-term	2	7-10	7-10	Yes	Mean_veh	40.5	SE_veh	7.27	Mean_exp	13.71	SE_exp	6.23	Graphs		at 8db prepulse	Unclear	Unclear	yes	yes
O’Tuathaigh et al.	2012	2		Mouse	COMT -/-	Male		WIN55,212–2	2.5		P32-52	5	1	i.p.	Vehicle			Social Interaction	Social preference	long-term	4	7-10	7-10				SE_veh							no data available	investigation time	Unclear	Unclear	yes	yes
O’Tuathaigh et al.	2012	3		Mouse	COMT -/-	Male		WIN55,212–2	2.5		P32-52	5	1	i.p.	Vehicle			Social Interaction	Social motivation	long-term	2	7-10	7-10	Yes	Mean±SE_V-Obj	153.73±20.9	Mean±SE_V-Ani	329.85±23.88	Mean±SE_E-Obj	158.62±12.07	Mean±SE_E-Ani	351.72±12.07	Graphs		investigation time	Unclear	Unclear	yes	yes
O’Tuathaigh et al.	2012	4		Mouse	Wildtype	Male		WIN55,212–2	2.5		P32-52	5	1	i.p.	Vehicle			Prepulse Inhibition		long-term	4	7-10	7-10	Yes	Mean_veh	33.75	SE_veh	5.01	Mean_exp	37.17	SE_exp	5.01	Graphs		investigation time	Unclear	Unclear	yes	yes
O’Tuathaigh et al.	2012	5		Mouse	Wildtype	Male		WIN55,212–2	2.5		P32-52	5	1	i.p.	Vehicle			Social Interaction	Social preference	long-term	4	7-10	7-10				SE_veh								investigation time	Unclear	Unclear	yes	yes
O’Tuathaigh et al.	2012	6		Mouse	Wildtype	Male		WIN55,212–2	2.5		P32-52	5	1	i.p.	Vehicle			Social Interaction	Social motivation	long-term	4	7-10	7-10	Yes	Mean±SE_V-Obj	181.03±6.9	SE_veh	322.41±18.97	Mean±SE_E-Obj	246.55±25.86	Mean±SE_E-Ani	272.41±31.04	Graphs		investigation time	Unclear	Unclear	yes	yes
O’Tuathaigh et al.	2012	7		Mouse	COMT -/-	Male		WIN55,212–2	1		P32-52	5	1	i.p.	Vehicle			Prepulse Inhibition		long-term	2	7-10	7-10	Yes	Mean_veh	40.5	SE_veh	7.27	Mean_exp	35.1	SE_exp	10.18	Graphs		investigation time	Unclear	Unclear	yes	yes
O’Tuathaigh et al.	2012	8		Mouse	COMT -/-	Male		WIN55,212–2	1		P32-52	5	1	i.p.	Vehicle			Social Interaction	Social preference	long-term	4	7-10	7-10				SE_veh							no data available	investigation time	Unclear	Unclear	yes	yes
O’Tuathaigh et al.	2012	9		Mouse	COMT -/-	Male		WIN55,212–2	1		P32-52	5	1	i.p.	Vehicle			Social Interaction	Social motivation	long-term	2	7-10	7-10	Yes	Mean±SE_V-Obj	153.73±20.9	Mean±SE_V-Ani	329.85±23.88	Mean±SE_E-Obj	198.28±12.06	Mean±SE_E-Ani	315.52±15.51	Graphs		investigation time	Unclear	Unclear	yes	yes
O’Tuathaigh et al.	2012	10		Mouse	Wildtype	Male		WIN55,212–2	1		P32-52	5	1	i.p.	Vehicle			Prepulse Inhibition		long-term	4	7-10	7-10	Yes	Mean_veh	33.75	SE_veh	5.01	Mean_exp	41.27	SE_exp	7.3	Graphs		investigation time	Unclear	Unclear	yes	yes
O’Tuathaigh et al.	2012	11		Mouse	Wildtype	Male		WIN55,212–2	1		P32-52	5	1	i.p.	Vehicle			Social Interaction	Social preference	long-term	4	7-10	7-10				SE_veh							no data available	investigation time	Unclear	Unclear	yes	yes
O’Tuathaigh et al.	2012	12		Mouse	Wildtype	Male		WIN55,212–2	1		P32-52	5	1	i.p.	Vehicle			Social Interaction	Social motivation	long-term	4	7-10	7-10	Yes	Mean±SE_V-Obj	181.03±6.9	SE_veh	322.41±18.97	Mean±SE_E-Obj	227.59±17.24	Mean±SE_E-Ani	279.31±20.69	Graphs		investigation time	Unclear	Unclear	yes	yes
Harte-Hargrove et al.	2012	1		Rat	Wildtype	Male		THC	2	Low	P35-41	5	1	i.p.	Vehicle			Open Field	Novelty-induced	short-term	3	9-14	9-14	Yes	Mean_veh	339.29	SE_veh	53.57	Mean_exp	361.61	SE_exp	53.57	Graphs		tested on P42 (highest efficacy)	Yes	Unclear	Unclear	yes
Harte-Hargrove et al.	2012	2		Rat	Wildtype	Male		THC	7.5	High	P35-41	5	1	i.p.	Vehicle			Open Field	Novelty-induced	short-term	3	9-14	9-14	Yes	Mean_veh	339.29	SE_veh	53.57	Mean_exp	290.18	SE_exp	40.18	Graphs		tested on P42 (highest efficacy)	Yes	Unclear	Unclear	yes
Harte-Hargrove et al.	2012	3		Rat	Wildtype	Male		THC	15	Very high	P35-41	5	1	i.p.	Vehicle			Open Field	Novelty-induced	short-term	3	9-14	9-14	Yes	Mean_veh	339.29	SE_veh	53.57	Mean_exp	223.21	SE_exp	40.18	Graphs		tested on P42 (highest efficacy)	Yes	Unclear	Unclear	yes
Harte-Hargrove et al.	2012	4		Rat	Wildtype	Male		THC	2	Low	P35-41	5	1	i.p.	Vehicle			Open Field	Novelty-induced	long-term	3	9-14	9-14	Yes	Mean_veh	454.55	SE_veh	41.66	Mean_exp	409.09	SE_exp	71.97	Graphs		repeated exp in P56 (highest efficacy)	Yes	Unclear	Unclear	yes
Harte-Hargrove et al.	2012	5		Rat	Wildtype	Male		THC	7.5	High	P35-41	5	1	i.p.	Vehicle			Open Field	Novelty-induced	long-term	3	9-14	9-14	Yes	Mean_veh	454.55	SE_veh	41.66	Mean_exp	481.06	SE_exp	75.76	Graphs		repeated exp in P56(highest efficacy)	Yes	Unclear	Unclear	yes
Harte-Hargrove et al.	2012	6		Rat	Wildtype	Male		THC	15	Very high	P35-41	5	1	i.p.	Vehicle			Open Field	Novelty-induced	long-term	3	9-14	9-14	Yes	Mean_veh	454.55	SE_veh	41.66	Mean_exp	287.88	SE_exp	26.51	Graphs		repeated exp in P56(highest efficacy)	Yes	Unclear	Unclear	yes
Harte-Hargrove et al.	2012	7		Rat	Wildtype	Female		THC	2	Low	P35-41	5	1	i.p.	Vehicle			Open Field	Novelty-induced	short-term	3	9-14	9-14	Yes	Mean_veh	504.46	SE_veh	89.29	Mean_exp	250	SE_exp	31.25	Graphs		tested on P42 (highest efficacy)	Yes	Unclear	Unclear	yes
Harte-Hargrove et al.	2012	8		Rat	Wildtype	Female		THC	7.5	High	P35-41	5	1	i.p.	Vehicle			Open Field	Novelty-induced	short-term	3	9-14	9-14	Yes	Mean_veh	504.46	SE_veh	89.29	Mean_exp	267.86	SE_exp	31.25	Graphs		tested on P42 (highest efficacy)	Yes	Unclear	Unclear	yes
Harte-Hargrove et al.	2012	9		Rat	Wildtype	Female		THC	15	Very high	P35-41	5	1	i.p.	Vehicle			Open Field	Novelty-induced	short-term	3	9-14	9-14	Yes	Mean_veh	504.46	SE_veh	89.29	Mean_exp	245.54	SE_exp	40.17	Graphs		tested on P42 (highest efficacy)	Yes	Unclear	Unclear	yes
Harte-Hargrove et al.	2012	10		Rat	Wildtype	Female		THC	2	Low	P35-41	5	1	i.p.	Vehicle			Open Field	Novelty-induced	long-term	3	9-14	9-14	Yes	Mean_veh	731.06	SE_veh	94.7	Mean_exp	492.42	SE_exp	71.97	Graphs		repeated exp in P56 (highest efficacy)	Yes	Unclear	Unclear	yes
Harte-Hargrove et al.	2012	11		Rat	Wildtype	Female		THC	7.5	High	P35-41	5	1	i.p.	Vehicle			Open Field	Novelty-induced	long-term	3	9-14	9-14	Yes	Mean_veh	731.06	SE_veh	94.7	Mean_exp	545.45	SE_exp	68.19	Graphs		repeated exp in P56(highest efficacy)	Yes	Unclear	Unclear	yes
Harte-Hargrove et al.	2012	12		Rat	Wildtype	Female		THC	15	Very high	P35-41	5	1	i.p.	Vehicle			Open Field	Novelty-induced	long-term	3	9-14	9-14	Yes	Mean_veh	731.06	SE_veh	94.7	Mean_exp	409.09	SE_exp	53.03	Graphs		repeated exp in P56(highest efficacy)	Yes	Unclear	Unclear	yes
Zamberletti et al.	2012	1		Rat	Wildtype	Male		THC	2.5-5-10	Escalating	P35-45	5	2	i.p.	Vehicle			Memory Discrimination	Novel object	long-term	1	5-6	5-6	Yes	Mean_veh	61.95	SE_veh	3.73	Mean_exp	23.97	SE_exp	3.73	Graphs			Unclear	yes	yes	Unclear
Zamberletti et al.	2012	2		Rat	Wildtype	Female		THC	2.5-5-10	Escalating	P35-45	5	2	i.p.	Vehicle			Memory Discrimination	Novel object	long-term	1	5-6	5-6	Yes	Mean_veh	36.11	SE_veh	8.71	Mean_exp	34.24	SE_exp	8.72	Graphs			Unclear	yes	yes	Unclear
Abush et al.	2012	1		Rat	Wildtype	Male		WIN55,212–2	1.2		P45-60	7	1	i.p.	Vehicle			Morris Water		short-term	1	8	7	Yes	Mean_veh		SE_veh		Mean_exp		SE_exp		Graphs	SE not available	10d post injection	Unclear	yes	yes	Unclear
Abush et al.	2012	2		Rat	Wildtype	Male		WIN55,212–2	1.2		P45-60	7	1	i.p.	Vehicle			Memory Discrimination	Novel object	short-term	1	8	8	No(specify)	Mean_veh	65.49	SE_veh	2.67	Mean_exp	49.07	SE_exp	5.35	Graphs		10d post injection , investigation ratio	Unclear	yes	yes	Unclear
Abush et al.	2012	3		Rat	Wildtype	Male		WIN55,212–2	1.2		P45-60	7	1	i.p.	Vehicle			Memory Discrimination	Novel object location	short-term	1	9	6	No(specify)	Mean_veh	54.9	SE_veh	5.49	Mean_exp	39.61	SE_exp	3.14	Graphs		10d post injection , investigation ratio	Unclear	yes	yes	Unclear
Abush et al.	2012	4		Rat	Wildtype	Male		WIN55,212–2	1.2		P45-60	7	1	i.p.	Vehicle			Open Field	Novelty-induced	short-term	1	10	9	Yes	Mean_veh	1381.59	SE_veh	91.43	Mean_exp	1406.98	SE_exp	96.51	Graphs		24h post injection	Unclear	yes	yes	Unclear
Abush et al.	2012	5		Rat	Wildtype	Male		WIN55,212–2	1.2		P45-60	7	1	i.p.	Vehicle			Memory Discrimination	Novel object	long-term	1	10	10	No(specify)	Mean_veh	53.65	SE_veh	3.82	Mean_exp	52.12	SE_exp	2.68	Graphs		repeated exp in adulthood, investigation ratio	Unclear	yes	yes	Unclear
Abush et al.	2012	6		Rat	Wildtype	Male		WIN55,212–2	1.2		P45-60	7	1	i.p.	Vehicle			Memory Discrimination	Novel object location	long-term	1	10	8	No(specify)	Mean_veh	59.61	SE_veh	4.7	Mean_exp	43.92	SE_exp	4.32	Graphs		repeated exp in adulthood, investigation ratio	Unclear	yes	yes	Unclear
Abush et al.	2012	7		Rat	Wildtype	Male		WIN55,212–2	1.2		P45-60	7	1	i.p.	Vehicle			Open Field	Novelty-induced	long-term	1	7	7	Yes	Mean_veh	1386.67	SE_veh	126.98	Mean_exp	1046.35	SE_exp	193.02	Graphs		repeated exp in adulthood	Unclear	yes	yes	Unclear
Abush et al.	2012	8		Rat	Wildtype	Male		WIN55,212–2	0.5		P45-60	7	1	i.p.	Vehicle			Memory Discrimination	Novel object location	long-term	1	7	10	No(specify)	Mean_veh	60.67	SE_veh	4.64	Mean_exp	45.34	SE_exp	5.11	Text		separate exp. investigation ratio, not index	Unclear	yes	yes	Unclear
Dow-Edwards et al.	2012	1		Rat	Wildtype	Male		WIN55,212–2	3	Middle	P34-41	5	1	i.p.	Vehicle			Open Field	Novelty-induced	short-term				Yes			SE_veh							no data available
Shen et al.	2011	1		Rat	Wildtype	Male		THC	5	Middle	P35-60	5	1/5	i.p.	Vehicle			Open Field	Novelty-induced	long-term	1	12	11	No(specify)	Mean_veh	58.1	SE_veh	3.5	Mean_exp	65.8	SE_exp	2.5	Text		total grid corssings	Unclear	Unclear	yes	Unclear
Mateos et al.	2011	1		Rat	Wildtype	Male		CP55,940	0.4		P28-43	4	1	i.p.	Vehicle			Memory Alternation	Y maze	short-term	1	6-12	6-12	Yes	Mean_veh	0.46	SE_veh	0.02	Mean_exp	0.62	SE_exp	0.03	Graphs			Unclear	Unclear	Unclear	Unclear
Mateos et al.	2011	2		Rat	Wildtype	Male		CP55,940	0.4		P28-43	4	1	i.p.	Vehicle			Memory Discrimination	Novel object location	long-term	1	6-11	6-11	Yes	Mean_veh	0.29	SE_veh	0.13	Mean_exp	0.25	SE_exp	0.07	Graphs			Unclear	Unclear	Unclear	Unclear
Mateos et al.	2011	3		Rat	Wildtype	Male		CP55,940	0.4		P28-43	4	1	i.p.	Vehicle			Memory Discrimination	Novel object	long-term	1	6-10	6-10	Yes	Mean_veh	0.38	SE_veh	0.04	Mean_exp	0.05	SE_exp	0.04	Graphs			Unclear	Unclear	Unclear	Unclear
Mateos et al.	2011	4		Rat	Wildtype	Female		CP55,940	0.4		P28-43	4	1	i.p.	Vehicle			Memory Alternation	Y maze	short-term	1	6-12	6-12	Yes	Mean_veh	0.63	SE_veh	0.06	Mean_exp	0.53	SE_exp	0.03	Graphs			Unclear	Unclear	Unclear	Unclear
Mateos et al.	2011	5		Rat	Wildtype	Female		CP55,940	0.4		P28-43	4	1	i.p.	Vehicle			Memory Discrimination	Novel object location	long-term	1	6-11	6-11	Yes	Mean_veh	0.51	SE_veh	0.06	Mean_exp	0.04	SE_exp	0.05	Graphs			Unclear	Unclear	Unclear	Unclear
Mateos et al.	2011	6		Rat	Wildtype	Female		CP55,940	0.4		P28-43	4	1	i.p.	Vehicle			Memory Discrimination	Novel object	long-term	1	6-10	6-10	Yes	Mean_veh	0.33	SE_veh	0.05	Mean_exp	0.23	SE_exp	0.05	Graphs			Unclear	Unclear	Unclear	Unclear
Chadwick et al.	2011	1		Rat	Wildtype	Female		CP55,940	0.4		P35-45	5	1	i.p.	Vehicle			Sucrose Preference		long-term	1	12-16	12-16	Yes	Mean_veh	76.4	SE_veh	7.9	Mean_exp	75.5	SE_exp	9.3	Text			Yes	Unclear	Yes	Yes
Llorente-Berzal et al.	2011	1		Rat	Wildtype	Male		CP55,940	0.4		P28-42	4	1	i.p.	Vehicle			Prepulse Inhibition		long-term	1	12-16	12-16	Yes	Mean_veh	49.07	SE_veh	6.3	Mean_exp	48.01	SE_exp	9.47	Graphs			Unclear	Unclear	Unclear	Unclear
Llorente-Berzal et al.	2011	2		Rat	Wildtype	Female		CP55,940	0.4		P28-42	4	1	i.p.	Vehicle			Prepulse Inhibition		long-term	1	12-16	12-16	Yes	Mean_veh	58.95	SE_veh	5.93	Mean_exp	36.98	SE_exp	11.16	Graphs			Unclear	Unclear	Unclear	Unclear
Llorente-Berzal et al.	2011	3		Rat	Wildtype	Male		CP55,940	0.4		P28-42	4	1	i.p.	Vehicle			Open Field	Novelty-induced	long-term	1	12-16	12-16	Yes	Mean_veh	4989.8	SE_veh	183.67	Mean_exp	5326.53	SE_exp	306.12	Graphs			Unclear	Unclear	Unclear	Unclear
Llorente-Berzal et al.	2011	4		Rat	Wildtype	Female		CP55,940	0.4		P28-42	4	1	i.p.	Vehicle			Open Field	Novelty-induced	long-term	1	12-16	12-16	Yes	Mean_veh	5357.14	SE_veh	275.51	Mean_exp	5234.69	SE_exp	214.29	Graphs			Unclear	Unclear	Unclear	Unclear
Realini et al.	2011	1		Rat	Wildtype	Female		THC	2.5-5-10	Escalating	P35-45	5	2	i.p.	Vehicle			Memory Discrimination	Novel object	long-term	1	5	5	Yes	Mean_veh	37.76	SE_veh	8.43	Mean_exp	12.07	SE_exp	7.79	Graphs			Unclear	yes	yes	Unclear
Realini et al.	2011	2		Rat	Wildtype	Female		THC	2.5-5-10	Escalating	P35-45	5	2	i.p.	Vehicle			Sucrose Preference		long-term	1	6	6	Yes	Mean_veh	42	SE_veh	20	Mean_exp	29	SE_exp	11.25	Graphs			Unclear	yes	yes	Unclear
Leweke et al.	2011	1		Rat	Wildtype	Male		WIN55,212–2	1.2		P45-60	7	irregular, 20 injections	i.p.	Vehicle			Social Interaction	Social preference	long-term	1	9	11	No(specify)	Mean_veh	69.03	SE_veh	1.55	Mean_exp	46.46	SE_exp	2.88	Graphs		investigation ratio, not index	Unclear	yes	yes	yes
O’Tuathaigh et al.	2010	1		Mouse	COMT -/-	Male		THC	4	Middle	P32-52	5	1	s.c.	Vehicle			Open Field	Novelty-induced	long-term	2	8-10	8-10	No(specify)	Mean_veh	2291	SE_veh	175	Mean_exp	3257	SE_exp	191	Text		ambulatory count	Unclear	Unclear	yes	yes
O’Tuathaigh et al.	2010	2		Mouse	COMT -/-	Male		THC	4	Middle	P32-52	5	1	s.c.	Vehicle			Memory Alternation	Y maze	long-term	2	8-10	8-10	Yes	Mean_veh	63.99	SE_veh	2.75	Mean_exp	56.65	SE_exp	3.44	Graphs			Unclear	Unclear	yes	yes
O’Tuathaigh et al.	2010	3		Mouse	COMT -/-	Male		THC	4	Middle	P32-52	5	1	s.c.	Vehicle			Memory Discrimination	Novel object	long-term	2	16-30	16-30	Yes	Mean_veh	58.4	SE_veh	5	Mean_exp	52.4	SE_exp	1.8	Text			Unclear	Unclear	yes	yes
O’Tuathaigh et al.	2010	4		Mouse	COMT -/-	Male		THC	4	Middle	P32-52	5	1	s.c.	Vehicle			Social Interaction	Social motivation	long-term							SE_veh							no data available		Unclear	Unclear	yes	yes
O’Tuathaigh et al.	2010	5		Mouse	COMT -/-	Male		THC	4	Middle	P32-52	5	1	s.c.	Vehicle			Social Interaction	Social preference	long-term	2	8-10	8-10	Yes	Familiar_veh±SE	178.74±23.19	SE_veh	340.1±23.19	Familiar_exp±SE	205.8±14.49	Novel_exp±SE	314.98±13.52	Graphs			Unclear	Unclear	yes	yes
O’Tuathaigh et al.	2010	6		Mouse	COMT -/-	Male		THC	8	Middle	P32-52	5	1	s.c.	Vehicle			Open Field	Novelty-induced	long-term	2	8-10	8-10	No(specify)	Mean_veh	2291	SE_veh	175	Mean_exp	3387	SE_exp	240	Text		ambulatory count	Unclear	Unclear	yes	yes
O’Tuathaigh et al.	2010	7		Mouse	COMT -/-	Male		THC	8	Middle	P32-52	5	1	s.c.	Vehicle			Memory Alternation	Y maze	long-term	2	8-10	8-10	Yes	Mean_veh	63.99	SE_veh	2.75	Mean_exp	57.34	SE_exp	3.21	Graphs			Unclear	Unclear	yes	yes
O’Tuathaigh et al.	2010	8		Mouse	COMT -/-	Male		THC	8	Middle	P32-52	5	1	s.c.	Vehicle			Memory Alternation	T maze	long-term	2	8-10	8-10	Yes	Mean_veh	66.74	SE_veh	4.27	Mean_exp	52.36	SE_exp	2.36	Graphs		30s Delayed alternation	Unclear	Unclear	yes	yes
O’Tuathaigh et al.	2010	9		Mouse	COMT -/-	Both		THC	8	Middle	P32-52	5	1	s.c.	Vehicle			Memory Discrimination	Novel object	long-term	2	16-30	16-30	Yes	Mean_veh	58.4	SE_veh	5	Mean_exp	52.3	SE_exp	7.8	Text			Unclear	Unclear	yes	yes
O’Tuathaigh et al.	2010	10		Mouse	COMT -/-	Male		THC	8	Middle	P32-52	5	1	s.c.	Vehicle			Social Interaction	Social motivation	long-term														no data available, data request sent		Unclear	Unclear	yes	yes
O’Tuathaigh et al.	2010	11		Mouse	COMT -/-	Male		THC	8	Middle	P32-52	5	1	s.c.	Vehicle			Social Interaction	Social preference	long-term	2	8-10	8-10	Yes	Familiar_veh±SE	178.74±23.19	Novel_veh±SE	340.1±23.19	Familiar_exp±SE	223.19±23.19	Novel_exp±SE	273.43±15.46	Graphs			Unclear	Unclear	yes	yes
O’Tuathaigh et al.	2010	12		Mouse	COMT -/-	Female		THC	4	Middle	P32-52	5	1	s.c.	Vehicle			Open Field	Novelty-induced	long-term	2	8-10	8-10	No(specify)	Mean_veh	3265	SE_veh	373	Mean_exp	3719	SE_exp	442	Text		ambulatory count	Unclear	Unclear	yes	yes
O’Tuathaigh et al.	2010	13		Mouse	COMT -/-	Female		THC	4	Middle	P32-52	5	1	s.c.	Vehicle			Memory Alternation	Y maze	long-term	2	8-10	8-10	Yes	Mean_veh	60.09	SE_veh	2.98	Mean_exp	61.7	SE_exp	2.75	Graphs			Unclear	Unclear	yes	yes
O’Tuathaigh et al.	2010	14		Mouse	COMT -/-	Female		THC	4	Middle	P32-52	5	1	s.c.	Vehicle			Social Interaction	Social motivation	long-term														no data available, data request sent		Unclear	Unclear	yes	yes
O’Tuathaigh et al.	2010	15		Mouse	COMT -/-	Female		THC	4	Middle	P32-52	5	1	s.c.	Vehicle			Social Interaction	Social preference	long-term	2	8-10	8-10	Yes	Familiar_veh±SE	190.34±28.02	Novel_veh±SE	319.81±34.78	Familiar_exp±SE	222.22±19.33	Novel_exp±SE	258.94±25.12	Graphs			Unclear	Unclear	yes	yes
O’Tuathaigh et al.	2010	16		Mouse	COMT -/-	Female		THC	8	Middle	P32-52	5	1	s.c.	Vehicle			Open Field	Novelty-induced	long-term	2	8-10	8-10	No(specify)	Mean_veh	3265	SE_veh	373	Mean_exp	3187	SE_exp	499	Text		ambulatory count	Unclear	Unclear	yes	yes
O’Tuathaigh et al.	2010	17		Mouse	COMT -/-	Female		THC	8	Middle	P32-52	5	1	s.c.	Vehicle			Memory Alternation	Y maze	long-term	2	8-10	8-10	Yes	Mean_veh	60.09	SE_veh	2.98	Mean_exp	49.31	SE_exp	2.52	Graphs			Unclear	Unclear	yes	yes
O’Tuathaigh et al.	2010	18		Mouse	COMT -/-	Female		THC	8	Middle	P32-52	5	1	s.c.	Vehicle			Social Interaction	Social motivation	long-term														no data available, data request sent		Unclear	Unclear	yes	yes
O’Tuathaigh et al.	2010	19		Mouse	COMT -/-	Female		THC	8	Middle	P32-52	5	1	s.c.	Vehicle			Social Interaction	Social preference	long-term	2	8-10	8-10	Yes	Familiar_veh±SE	190.34±28.02	Novel_veh±SE	319.81±34.78	Familiar_exp±SE	219.32±23.19	Novel_exp±SE	254.11±19.32	Graphs			Unclear	Unclear	yes	yes
O’Tuathaigh et al.	2010	20		Mouse	Wildtype	Male		THC	4	Middle	P32-52	5	1	s.c.	Vehicle			Open Field	Novelty-induced	long-term	2	8-10	8-10	No(specify)	Mean_veh	2855	SE_veh	325	Mean_exp	2386	SE_exp	103	Text		ambulatory count	Unclear	Unclear	yes	yes
O’Tuathaigh et al.	2010	21		Mouse	Wildtype	Male		THC	4	Middle	P32-52	5	1	s.c.	Vehicle			Memory Alternation	Y maze	long-term	2	8-10	8-10	Yes	Mean_veh	60.09	SE_veh	2.98	Mean_exp	61.7	SE_exp	2.75	Graphs			Unclear	Unclear	yes	yes
O’Tuathaigh et al.	2010	22		Mouse	Wildtype	Both		THC	4	Middle	P32-52	5	1	s.c.	Vehicle			Memory Discrimination	Novel object	long-term	2	16-30	16-30	Yes	Mean_veh	54.4	SE_veh	2.1	Mean_exp	55.8	SE_exp	3.8	Text			Unclear	Unclear	yes	yes
O’Tuathaigh et al.	2010	23		Mouse	Wildtype	Male		THC	4	Middle	P32-52	5	1	s.c.	Vehicle			Social Interaction	Social motivation	long-term														no data available, data request sent		Unclear	Unclear	yes	yes
O’Tuathaigh et al.	2010	24		Mouse	Wildtype	Male		THC	4	Middle	P32-52	5	1	s.c.	Vehicle			Social Interaction	Social preference	long-term	2	8-10	8-10	Yes	Familiar_veh±SE	174.88±13.53	Novel_veh±SE	346.86±17.39	Familiar_exp±SE	239.61±14.5	Novel_exp±SE	275.36±17.39	Graphs			Unclear	Unclear	yes	yes
O’Tuathaigh et al.	2010	25		Mouse	Wildtype	Male		THC	8	Middle	P32-52	5	1	s.c.	Vehicle			Open Field	Novelty-induced	long-term	2	8-10	8-10	No(specify)	Mean_veh	2855	SE_veh	325	Mean_exp	2703	SE_exp	191	Text		ambulatory count	Unclear	Unclear	yes	yes
O’Tuathaigh et al.	2010	26		Mouse	Wildtype	Male		THC	8	Middle	P32-52	5	1	s.c.	Vehicle			Memory Alternation	Y maze	long-term	2	8-10	8-10	Yes	Mean_veh	60.09	SE_veh	2.98	Mean_exp	49.31	SE_exp	2.52	Graphs			Unclear	Unclear	yes	yes
O’Tuathaigh et al.	2010	27		Mouse	Wildtype	Male		THC	8	Middle	P32-52	5	1	s.c.	Vehicle			Memory Alternation	T maze	long-term	2	8-10	8-10	Yes	Mean_veh	62.47	SE_veh	4.5	Mean_exp	52.81	SE_exp	4.04	Graphs		30s Delayed alternation	Unclear	Unclear	yes	yes
O’Tuathaigh et al.	2010	28		Mouse	Wildtype	Both		THC	8	Middle	P32-52	5	1	s.c.	Vehicle			Memory Discrimination	Novel object	long-term	2	16-30	16-30	Yes	Mean_veh	54.4	SE_veh	2.1	Mean_exp	46.4	SE_exp	4.5	Text			Unclear	Unclear	yes	yes
O’Tuathaigh et al.	2010	29		Mouse	Wildtype	Male		THC	8	Middle	P32-52	5	1	s.c.	Vehicle			Social Interaction	Social motivation	long-term														no data available, data request sent		Unclear	Unclear	yes	yes
O’Tuathaigh et al.	2010	30		Mouse	Wildtype	Male		THC	8	Middle	P32-52	5	1	s.c.	Vehicle			Social Interaction	Social preference	long-term	2	8-10	8-10	Yes	Familiar_veh±SE	174.88±13.53	Novel_veh±SE	346.86±17.39	Familiar_exp±SE	171.98±15.46	Novel_exp±SE	337.2±17.39	Graphs			Unclear	Unclear	yes	yes
O’Tuathaigh et al.	2010	31		Mouse	Wildtype	Female		THC	4	Middle	P32-52	5	1	s.c.	Vehicle			Open Field	Novelty-induced	long-term	2	8-10	8-10	No(specify)	Mean_veh	2943	SE_veh	177	Mean_exp	2656	SE_exp	485	Text		ambulatory count	Unclear	Unclear	yes	yes
O’Tuathaigh et al.	2010	32		Mouse	Wildtype	Female		THC	4	Middle	P32-52	5	1	s.c.	Vehicle			Memory Alternation	Y maze	long-term	2	8-10	8-10	Yes	Mean_veh	61.47	SE_veh	2.75	Mean_exp	54.82	SE_exp	2.52	Graphs			Unclear	Unclear	yes	yes
O’Tuathaigh et al.	2010	33		Mouse	Wildtype	Female		THC	4	Middle	P32-52	5	1	s.c.	Vehicle			Social Interaction	Social motivation	long-term														no data available, data request sent		Unclear	Unclear	yes	yes
O’Tuathaigh et al.	2010	34		Mouse	Wildtype	Female		THC	4	Middle	P32-52	5	1	s.c.	Vehicle			Social Interaction	Social preference	long-term	2	8-10	8-10	Yes	Familiar_veh±SE	178.74±49.28	Novel_veh±SE	279.23±18.35	Familiar_exp±SE	210.63±11.59	Novel_exp±SE	285.02±17.4	Graphs			Unclear	Unclear	yes	yes
O’Tuathaigh et al.	2010	35		Mouse	Wildtype	Female		THC	8	Middle	P32-52	5	1	s.c.	Vehicle			Open Field	Novelty-induced	long-term	2	8-10	8-10	No(specify)	Mean_veh	2943	SE_veh	177	Mean_exp	2891	SE_exp	203	Text		ambulatory count	Unclear	Unclear	yes	yes
O’Tuathaigh et al.	2010	36		Mouse	Wildtype	Female		THC	8	Middle	P32-52	5	1	s.c.	Vehicle			Memory Alternation	Y maze	long-term	2	8-10	8-10	Yes	Mean_veh	61.47	SE_veh	2.75	Mean_exp	51.15	SE_exp	3.44	Graphs			Unclear	Unclear	yes	yes
O’Tuathaigh et al.	2010	37		Mouse	Wildtype	Female		THC	8	Middle	P32-52	5	1	s.c.	Vehicle			Social Interaction	Social motivation	long-term														no data available, data request sent		Unclear	Unclear	yes	yes
O’Tuathaigh et al.	2010	38		Mouse	Wildtype	Female		THC	8	Middle	P32-52	5	1	s.c.	Vehicle			Social Interaction	Social preference	long-term	2	8-10	8-10	Yes	Familiar_veh±SE	178.74±49.28	Novel_veh±SE	279.23±18.35	Familiar_exp±SE	241.55±23.18	Novel_exp±SE	259.9±15.46	Graphs			Unclear	Unclear	yes	yes
Bambico et al.	2010	1		Rat	Wildtype	Male		WIN55,212–2	0.2		P30-50	5	1	i.p.	Vehicle			Open Field	Novelty-induced	long-term	2	8-18	8-18	Yes	Mean_veh	1310.24	SE_veh	248.49	Mean_exp	1054.22	SE_exp	180.72	Graphs			Unclear	Unclear	Unclear	Unclear
Bambico et al.	2010	2		Rat	Wildtype	Male		WIN55,212–2	0.2		P30-50	5	1	i.p.	Vehicle			Sucrose Preference		long-term	2	8-17	8-17	Yes	Mean_veh	95.44	SE_veh	3.01	Mean_exp	59.87	SE_exp	7.01	Graphs			Unclear	Unclear	Unclear	Unclear
Bambico et al.	2010	3		Rat	Wildtype	Male		WIN55,212–2	1		P30-50	5	1	i.p.	Vehicle			Open Field	Novelty-induced	long-term	2	8-18	8-18	Yes	Mean_veh	1310.24	SE_veh	248.49	Mean_exp	1701.81	SE_exp	248.49	Graphs			Unclear	Unclear	Unclear	Unclear
Bambico et al.	2010	4		Rat	Wildtype	Male		WIN55,212–2	1		P30-50	5	1	i.p.	Vehicle			Sucrose Preference		long-term	2	8-17	8-17	Yes	Mean_veh	95.44	SE_veh	3.01	Mean_exp	68.64	SE_exp	9.27	Graphs			Unclear	Unclear	Unclear	Unclear
Higuera-Matas et al.	2009	1		Rat	Wildtype	Male		CP55,940	0.4		P28-38	4	1	i.p.	Vehicle			Memory Discrimination	Novel object	long-term	1	8	9	Yes	Mean_veh	0.57	SE_veh	0.04	Mean_exp	0.59	SE_exp	0.06	Text			Unclear	Unclear	Unclear	Unclear
Higuera-Matas et al.	2009	2		Rat	Wildtype	Male		CP55,940	0.4		P28-38	4	1	i.p.	Vehicle			Morris Water		long-term	1	8	9	Yes	Mean_veh	43.77	SE_veh	7.32	Mean_exp	26.74	SE_exp	7.32	Graphs			Unclear	Unclear	Unclear	Unclear
Higuera-Matas et al.	2009	3		Rat	Wildtype	Male		CP55,940	0.4		P28-38	4	1	i.p.	Vehicle			Memory Discrimination	Novel object	long-term	1	8	11	Yes	Mean_veh	0.54	SE_veh	0.04	Mean_exp	0.59	SE_exp	0.03	Text			Unclear	Unclear	Unclear	Unclear
Higuera-Matas et al.	2009	4		Rat	Wildtype	Male		CP55,940	0.4		P28-38	4	1	i.p.	Vehicle			Morris Water		long-term	1	8	9	Yes	Mean_veh	31.03	SE_veh	5.89	Mean_exp	46.47	SE_exp	5.25	Graphs			Unclear	Unclear	Unclear	Unclear
Rubino T et al.	2009	1		Rat	Wildtype	Male		THC	2.5-5-10	Escalating	P35-45	5	2	i.p.	Vehicle			Memory Alternation	Radial arm maze	long-term															not enough number of studies	Unclear	Unclear	Unclear	Unclear
Rubino et al.	2009	1		Rat	Wildtype	Female		THC	2.5-5-10	Escalating	P35-45	5	2	i.p.	Vehicle			Memory Alternation	Radial arm maze	long-term															not enough number of studies	Unclear	Unclear	Unclear	Unclear
Wegener N et al.	2008	1		Rat	Wildtype	Male		WIN55,212–2	1.2		P45-60	7	irregular, 20 injections	i.p.	Vehicle			Open Field	Novelty-induced	long-term	1	22	24	Yes	Mean_veh	110.48	SE_veh	6.62	Mean_exp	146.13	SE_exp	9.68	Graphs		can infer t from p?	Unclear	Unclear	Unclear	yes
Wegener N et al.	2008	2		Rat	Wildtype	Male		WIN55,212–2	1.2		P45-60	7	irregular, 20 injections	i.p.	Vehicle			Prepulse Inhibition		long-term	1	22	24	Yes	Mean_veh	62.67	SE_veh	3.46	Mean_exp	38.71	SE_exp	5.76	Graphs			Unclear	Unclear	Unclear	yes
Rubino et al.	2008	1		Rat	Wildtype	Male		THC	2.5-5-10	Escalating	P35-45	5	2	i.p.	Vehicle			Open Field	Novelty-induced	long-term	1	10	10	Yes	Mean_veh	2873.4	SE_veh	296.879	Mean_exp	2867.6	SE_exp	313.709	data obtained from author			Unclear	Unclear	Unclear	yes
Rubino et al.	2008	2		Rat	Wildtype	Female		THC	2.5-5-10	Escalating	P35-45	5	2	i.p.	Vehicle			Open Field	Novelty-induced	long-term	1	10	10	Yes	Mean_veh	3154.4	SE_veh	302.885	Mean_exp	959.2	SE_exp	85.1995	data obtained from author			Unclear	Unclear	Unclear	yes
Rubino et al.	2008	3		Rat	Wildtype	Male		THC	2.5-5-10	Escalating	P35-45	5	2	i.p.	Vehicle			Sucrose Preference		long-term	1	5	5	Yes	Mean_veh	197.69	SE_veh	21.8228	Mean_exp	128.37	SE_exp	21.566	Graphs		repeated SPT, data taken from d3	Unclear	Unclear	Unclear	yes
Rubino et al.	2008	4		Rat	Wildtype	Female		THC	2.5-5-10	Escalating	P35-45	5	2	i.p.	Vehicle			Sucrose Preference		long-term	1	5	5	Yes	Mean_veh	216.689	SE_veh	19	Mean_exp	159.179	SE_exp	19.7689	Graphs		repeated SPT, data taken from d3	Unclear	Unclear	Unclear	yes
Schneider et al.	2008	1		Rat	Wildtype	Male		WIN55,212–2	1.2		P40-65	5	1	i.p.	Vehicle			Memory Discrimination	Novel object	short-term	1	14	17	Yes	Mean_veh	5.8	SE_veh	1.7	Mean_exp	1.7	SE_exp	1.1	Text			Unclear	yes	yes	Unclear
Schneider et al.	2008	2		Rat	Wildtype	Male		WIN55,212–2	1.2		P40-65	5	1	i.p.	Vehicle			Social Interaction	Social preference	short-term	1	14	17	Yes	Mean_veh	21.1	SE_veh	2.6	Mean_exp	-1.5	SE_exp	2.8	Text			Unclear	yes	yes	Unclear
Schneider et al.	2008	3		Rat	Wildtype	Male		WIN55,212–2	1.2		P40-65	5	1	i.p.	Vehicle			Memory Discrimination	Novel object	long-term	1	14	17	Yes	Mean_veh	7.1	SE_veh	1	Mean_exp	1.2	SE_exp	1	Text		repeated exp in adulthood	Unclear	yes	yes	Unclear
Schneider et al.	2008	4		Rat	Wildtype	Male		WIN55,212–2	1.2		P40-65	5	1	i.p.	Vehicle			Social Interaction	Social preference	long-term	1	14	17	Yes	Mean_veh	16	SE_veh	3.5	Mean_exp	0.7	SE_exp	2.2	Text		repeated exp in adulthood	Unclear	yes	yes	Unclear
Quinn et al.	2008	1		Rat	Wildtype	Male		THC	2-5	Middle	P32-55	5	varied	i.p.	Vehicle			Memory Discrimination	Novel object	long-term	1				Mean_veh		SE_veh		Mean_exp		SE_exp			sample sizes, data request sent
Cha et al.	2007	1		Rat	Wildtype	Male		THC	5	Middle	P30-50	5	1	i.p.	Vehicle			Morris Water		long-term	1	8	8	No(specify)										No useful measure	distance. Not latency
Cha et al.	2007	2		Rat	Wildtype	Female		THC	5	Middle	P30-50	5	1	i.p.	Vehicle			Morris Water		long-term	1	8	8	No(specify)										No useful measure	distance. Not latency
Schneider & Koch	2007	1		Rat	Wildtype	Male		WIN55,212–2	1.2		P45-65	7	irregular, 20 injections	i.p.	Vehicle			Open Field	Novelty-induced	long-term	1	10	10	Yes										no data available
O’Shea et al.	2006	1		Rat	Wildtype	Male		CP55,940	1.5-2-3		P30-50	5	1	i.p.	Vehicle			Memory Discrimination	Novel object	long-term	1			No(specify)										sample sizes
O’Shea et al.	2006	2		Rat	Wildtype	Male		CP55,940	1.5-2-3		P30-50	5	1	i.p.	Vehicle			Open Field	Novelty-induced	long-term	1			No(specify)										sample sizes	latency, not time
Cha YM	2006	1		Rat	Wildtype	Male		THC	5		P30-50	5	1	i.p.	Vehicle			Morris Water		long-term	1	10	10	No(specify)											distance. Not latency	Unclear	Unclear	Unclear	yes
Schneider M	2005	1		Rat	Wildtype	Male		WIN55,212–2	1.2		P15-40	3	irregular, 20 injections	i.p.	Vehicle			Open Field	Novelty-induced	long-term	1	9	10	Yes	Mean_veh	180	SE_veh	20	Mean_exp	147.27	SE_exp	12.73	Graphs			Unclear	Unclear	Unclear	Unclear
Schneider M	2005	2		Rat	Wildtype	Male		WIN55,212–2	1.2		P15-40	3	irregular, 20 injections	i.p.	Vehicle			Prepulse Inhibition		long-term	1	8	8	Yes	Mean_veh	58.12	SE_veh	4.7	Mean_exp	24.94	SE_exp	6.35	Graphs			Unclear	Unclear	Unclear	Unclear
Schneider M	2004	1		Rat	Wildtype	Male		WIN55,212–2	1.2		P45-65	7	irregular, 20 injections	i.p.	Vehicle			Open Field	Novelty-induced	long-term	1	10	12	Yes	Mean_veh	157.8	SE_veh	18.2	Mean_exp	138.8	SE_exp	15.3	Text			Unclear	Unclear	Unclear	Unclear
O’Shea et al.	2004	1		Rat	Wildtype	Female		CP55,940	1.5-2-3		P30-50	5	1	i.p.	Vehicle			Memory Discrimination	Novel object	long-term	1	20	20	No(specify)	Mean_veh	62.14	SE_veh	3.1	Mean_exp	54.79	SE_exp	3.01	Graphs		investigation ratio, not index	Unclear	yes	yes	Unclear
Biscaia et al.	2003	1		Rat	Wildtype	Male		CP55,940	0.4		P35-45	5	1	i.p.	Vehicle			Open Field	Novelty-induced	long-term	1	16	17	No(specify)	Mean_veh		SE_veh		Mean_exp		SE_exp		Text	No useful measure	suqares entered
Biscaia et al.	2003	2		Rat	Wildtype	Female		CP55,940	0.4		P35-45	5	1	i.p.	Vehicle			Open Field	Novelty-induced	long-term	1	13	10	No(specify)	Mean_veh		SE_veh		Mean_exp		SE_exp		Text	No useful measure	suqares entered
Schneider& Koch	2003	1		Rat	Wildtype	Both		WIN55,212–2	1.2		P45-65	7	irregular, 20 injections	i.p.	Vehicle			Prepulse Inhibition		long-term	1	11	11	Yes	Mean_veh	66.05	SE_veh	3.71	Mean_exp	35.28	SE_exp	7.96	Graphs			Unclear	yes	Unclear	yes
Schneider& Koch	2003	2		Rat	Wildtype	Both		WIN55,212–2	1.2		P45-65	7	irregular, 20 injections	i.p.	Vehicle			Open Field	Novelty-induced	long-term														no data available		Unclear	yes	Unclear	yes
Holson RR	1989	1																																full-text unavailable		Unclear	Unclear	Unclear	Unclear
Mario et al.	2024	1		Rat	Wildtype	Male		THC	3	Middle	P28-44	4	1/2	i.p.	Vehicle					long-term														only anova output, data request sent
Mario et al.	2024	2		Rat	Wildtype	Male		THC	3	Middle	P28-44	4	1/2	i.p.	Vehicle					long-term														only anova output, data request sent
Mario et al.	2024	3		Rat	Wildtype	Male		THC	3	Middle	P28-44	4	1/2	i.p.	Vehicle					long-term														only anova output, data request sent
Mario et al.	2024	4		Rat	Wildtype	Male		THC	3	Middle	P28-44	4	1/2	i.p.	Vehicle					long-term														only anova output, data request sent
Mario et al.	2024	5		Rat	Wildtype	Male		THC	3	Middle	P28-44	4	1/2	i.p.	Vehicle					long-term														only anova output, data request sent
Mario et al.	2024	6		Rat	Wildtype	Male		THC	3	Middle	P28-44	4	1/2	i.p.	Vehicle					long-term														only anova output, data request sent
Yuto Hasegawa et al.	2023	1		Mouse	Wildtype	Male		THC	8	High	P30-51	5	1	s.c.	Vehicle			Social Interaction	Social preference	long-term														only anova output, data request sent
Yuto Hasegawa et al.	2023	2		Mouse	16p11dup	Male		THC	8	High	P30-51	5	1	s.c.	Vehicle			Social Interaction	Social motivation	long-term														only anova output, data request sent
Yuto Hasegawa et al.	2023	3		Mouse	Wildtype	Female		THC	8	High	P30-51	5	1	s.c.	Vehicle			Memory Discrimination	Novel object	long-term	1	8	8	No(specify)	Mean_veh	69.3852	SE_veh	5.96049	Mean_exp	58.0965	SE_exp	5.49425	supplementary table		Investigation ratio, not DI	Unclear	Unclear	Unclear	Unclear
Yuto Hasegawa et al.	2023	4		Mouse	16p11dup	Female		THC	8	High	P30-51	5	1	s.c.	Vehicle			Memory Discrimination	Novel object	long-term	1	7	8	No(specify)	Mean_veh	77.4878	SE_veh	4.38033	Mean_exp	59.3327	SE_exp	4.86202	supplementary table		Investigation ratio, not DI	Unclear	Unclear	Unclear	Unclear
Yuto Hasegawa et al.	2023	5		Mouse	Wildtype	Male		THC	8	High	P30-51	5	1	s.c.	Vehicle			Open Field	Novelty-induced	long-term	1	8	8	No(specify)	Mean_veh	4203.38	SE_veh	190.277	Mean_exp	4095.38	SE_exp	238.063	supplementary table		beam breaks	Unclear	Unclear	Unclear	Unclear
Yuto Hasegawa et al.	2023	6		Mouse	16p11dup	Male		THC	8	High	P30-51	5	1	s.c.	Vehicle			Open Field	Novelty-induced	long-term	1	11	7	No(specify)	Mean_veh	3570.18	SE_veh	189.61	Mean_exp	3707.71	SE_exp	253.338	supplementary table		beam breaks	Unclear	Unclear	Unclear	Unclear
Yuto Hasegawa et al.	2023	7		Mouse	Wildtype	Female		THC	8	High	P30-51	5	1	s.c.	Vehicle			Open Field	Novelty-induced	long-term	1	8	8	No(specify)	Mean_veh	4065.25	SE_veh	130.161	Mean_exp	4050.88	SE_exp	307.371	supplementary table		beam breaks	Unclear	Unclear	Unclear	Unclear
Yuto Hasegawa et al.	2023	8		Mouse	16p11dup	Female		THC	8	High	P30-51	5	1	s.c.	Vehicle			Open Field	Novelty-induced	long-term	1	7	8	No(specify)	Mean_veh	4905	SE_veh	202.965	Mean_exp	4412.75	SE_exp	344.025	supplementary table		beam breaks	Unclear	Unclear	Unclear	Unclear
Yuto Hasegawa et al.	2023	9		Mouse	Wildtype	Female		THC	8	High	P30-51	5	1	s.c.	Vehicle			Social Interaction	Social preference															only anova output, data request sent		Unclear	Unclear	Unclear	Unclear
Yuto Hasegawa et al.	2023	10		Mouse	16p11dup	Female		THC	8	High	P30-51	5	1	s.c.	Vehicle			Social Interaction	Social motivation															only anova output, data request sent		Unclear	Unclear	Unclear	Unclear
Yuto Hasegawa et al.	2023	11		Mouse	Wildtype	Female		THC	8	High	P30-51	5	1	s.c.	Vehicle			Memory Discrimination	Novel object location	long-term	1	8	8	No(specify)	Mean_veh	66.0787	SE_veh	5.70145	Mean_exp	58.6785	SE_exp	7.87214	supplementary table		Investigation ratio, not DI	Unclear	Unclear	Unclear	Unclear
Yuto Hasegawa et al.	2023	12		Mouse	16p11dup	Female		THC	8	High	P30-51	5	1	s.c.	Vehicle			Memory Discrimination	Novel object location	long-term	1	7	8	No(specify)	Mean_veh	82.2063	SE_veh	4.73363	Mean_exp	54.0264	SE_exp	8.49818	supplementary table		Investigation ratio, not DI	Unclear	Unclear	Unclear	Unclear
Yuto Hasegawa et al.	2023	13		Mouse	Wildtype	Male		THC	8	High	P30-51	5	1	s.c.	Vehicle			Social Interaction	Social preference	long-term	1	17	15	Yes	Mean_veh	0.2182	SE_veh	0.0714	Mean_exp	0.0689	SE_exp	0.1345	supplementary table			Unclear	Unclear	Unclear	Unclear
Yuto Hasegawa et al.	2023	14		Mouse	16p11dup	Male		THC	8	High	P30-51	5	1	s.c.	Vehicle			Social Interaction	Social preference	long-term	1	11	11	Yes	Mean_veh	9.5e-05	SE_veh	0.097	Mean_exp	−0.0697	SE_exp	0.0879	supplementary table			Unclear	Unclear	Unclear	Unclear
Yuto Hasegawa et al.	2023	15		Mouse	Wildtype	Male		THC	8	High	P30-51	5	1	s.c.	Vehicle			Social Interaction	Social motivation	long-term	1	17	15	Yes	Mean_veh	0.2588	SE_veh	0.0624	Mean_exp	0.4035	SE_exp	0.059	supplementary table			Unclear	Unclear	Unclear	Unclear
Yuto Hasegawa et al.	2023	16		Mouse	16p11dup	Male		THC	8	High	P30-51	5	1	s.c.	Vehicle			Social Interaction	Social motivation	long-term	1	11	11	Yes	Mean_veh	0.5338	SE_veh	0.0803	Mean_exp	0.4887	SE_exp	0.0792	supplementary table			Unclear	Unclear	Unclear	Unclear
Yuto Hasegawa et al.	2023	13		Mouse	Wildtype	Female		THC	8	High	P30-51	5	1	s.c.	Vehicle			Social Interaction	Social preference	long-term	1	10	10	Yes	Mean_veh	19.9122	SE_veh	5.07152	Mean_exp	20.0566	SE_exp	7.13671	supplementary table			Unclear	Unclear	Unclear	Unclear
Yuto Hasegawa et al.	2023	14		Mouse	16p11dup	Female		THC	8	High	P30-51	5	1	s.c.	Vehicle			Social Interaction	Social preference	long-term	1	15	15	Yes	Mean_veh	15.1777	SE_veh	5.46303	Mean_exp	30.9303	SE_exp	3.39437	supplementary table			Unclear	Unclear	Unclear	Unclear
Yuto Hasegawa et al.	2023	15		Mouse	Wildtype	Female		THC	8	High	P30-51	5	1	s.c.	Vehicle			Social Interaction	Social motivation	long-term	1	10	10	Yes	Mean_veh	19.6558	SE_veh	7.36195	Mean_exp	22.0001	SE_exp	6.19253	supplementary table			Unclear	Unclear	Unclear	Unclear
Yuto Hasegawa et al.	2023	16		Mouse	16p11dup	Female		THC	8	High	P30-51	5	1	s.c.	Vehicle			Social Interaction	Social motivation	long-term	1	15	15	Yes	Mean_veh	22.024	SE_veh	6.60311	Mean_exp	24.6041	SE_exp	6.53847	supplementary table			Unclear	Unclear	Unclear	Unclear
Olatunji Sunday Yinka	2022	1		Rat	Wildtype	Male		cannabis extract	10		NA		1	oral	distilled water	orograstrical		Open Field	Novelty-induced	short-term	3	7	7	No(specify)	Mean_veh	49.0541	SE_veh	3.14449	Mean_exp	28.9865	SE_exp	4.2567	Graphs		line crossing	Unclear	Unclear	Unclear	yes
Olatunji Sunday Yinka	2022	2		Rat	Wildtype	Male		cannabis extract	50		NA		1	oral	distilled water	orograstrical		Open Field	Novelty-induced	short-term	3	7	7	No(specify)	Mean_veh	49.0541	SE_veh	3.14449	Mean_exp	39.9324	SE_exp	6.6892	Graphs		line crossing	Unclear	Unclear	Unclear	yes
Olatunji Sunday Yinka	2022	3		Rat	Wildtype	Male		cannabis extract	100		NA		1	oral	distilled water	orograstrical		Open Field	Novelty-induced	short-term	3	7	7	No(specify)	Mean_veh	49.0541	SE_veh	3.14449	Mean_exp	31.2162	SE_exp	4.7635	Graphs		line crossing	Unclear	Unclear	Unclear	yes
Olatunji Sunday Yinka	2022	4		Rat	Wildtype	Male		cannabis extract	10		NA		1	oral	distilled water	orograstrical		Memory Alternation	Y maze	short-term	3	7	7	Yes	Mean_veh	3.014	SE_veh	1.1215	Mean_exp	3.1386	SE_exp	0.8567	Graphs			Unclear	Unclear	Unclear	yes
Olatunji Sunday Yinka	2022	5		Rat	Wildtype	Male		cannabis extract	50		NA		1	oral	distilled water	orograstrical		Memory Alternation	Y maze	short-term	3	7	7	Yes	Mean_veh	3.014	SE_veh	1.1215	Mean_exp	3.8551	SE_exp	0.7944	Graphs			Unclear	Unclear	Unclear	yes
Olatunji Sunday Yinka	2022	6		Rat	Wildtype	Male		cannabis extract	100		NA		1	oral	distilled water	orograstrical		Memory Alternation	Y maze	short-term	3	7	7	Yes	Mean_veh	3.014	SE_veh	1.1215	Mean_exp	2.8427	SE_exp	0.8723	Graphs			Unclear	Unclear	Unclear	yes
Patricia Felix Rolo Gonçalves	2023	1		Mouse	Wildtype	Male		WIN55,212–2	2		P28-47	4	1	s.c.	Vehicle			Open Field	Novelty-induced	short-term	1	16	15	Yes	Mean_veh	34.5588	SE_veh	2.5736	Mean_exp	36.3971	SE_exp	3.6764	Graphs			Yes	Unclear	Unclear	Unclear
Patricia Felix Rolo Gonçalves	2023	2		Mouse	Wildtype	Male		WIN55,212–2	2		P28-47	4	1	s.c.	Vehicle			Memory Discrimination	Novel object	short-term	1	16	15	No(specify)	Mean_veh	63.4652	SE_veh	3.7825	Mean_exp	58.8512	SE_exp	3.8247	Graphs		investigation ratio, not index, 1hr ITI	Yes	Unclear	Unclear	Unclear
Patricia Felix Rolo Gonçalves	2023	3		Mouse	Wildtype	Male		WIN55,212–2	2		P28-47	4	1	s.c.	Vehicle			Prepulse Inhibition		short-term	1	16	15	Yes	Mean_veh	39.9151	SE_veh	8.9172	Mean_exp	50.3185	SE_exp	7.2187	Graphs		90db	Yes	Unclear	Unclear	Unclear
Patricia Felix Rolo Gonçalves	2023	4		Mouse	Wildtype	Male		WIN55,212–2	2		P28-47	4	1	s.c.	Vehicle			Memory Alternation	Y maze	short-term	1	16	15	Yes	Mean_veh	66.9118	SE_veh	2.3897	Mean_exp	66.1765	SE_exp	2.5735	Graphs			Yes	Unclear	Unclear	Unclear
Patricia Felix Rolo Gonçalves	2023	4		Mouse	Wildtype	Male		WIN55,212–2	2		P28-47	4	1	s.c.	Vehicle			Open Field	Novelty-induced	long-term	1	14	13	Yes	Mean_veh	8.4872	SE_veh	0.641	Mean_exp	8.5641	SE_exp	0.5385	Graphs			Yes	Unclear	Unclear	Unclear
Patricia Felix Rolo Gonçalves	2023	5		Mouse	Wildtype	Male		WIN55,212–2	2		P28-47	4	1	s.c.	Vehicle			Memory Discrimination	Novel object	long-term	1	12	12	No(specify)	Mean_veh	63.4049	SE_veh	3.9778	Mean_exp	67.7804	SE_exp	4.6142	Graphs		investigation ratio, not index, 1hr ITI	Yes	Unclear	Unclear	Unclear
Patricia Felix Rolo Gonçalves	2023	6		Mouse	Wildtype	Male		WIN55,212–2	2		P28-47	4	1	s.c.	Vehicle			Prepulse Inhibition		long-term	1	14	14	Yes	Mean_veh	54.8628	SE_veh	6.7332	Mean_exp	55.8603	SE_exp	3.9901	Graphs		90db	Yes	Unclear	Unclear	Unclear
Patricia Felix Rolo Gonçalves	2023	4		Mouse	Wildtype	Male		WIN55,212–2	2		P28-47	4	1	s.c.	Vehicle			Memory Alternation	Y maze	long-term	1	14	14	Yes	Mean_veh	61.3316	SE_veh	3.3291	Mean_exp	65.8131	SE_exp	3.32931	Graphs			Yes	Unclear	Unclear	Unclear
Martina Di Bartolomeo	2023	1		Rat	Wildtype	Male		THC	2.5-5-10		P29-38	5	1	i.p.	Vehicle			Open Field	Novelty-induced	long-term	1	14	10	No(specify)	Mean_veh	125	SE_veh	9.4037	Mean_exp	138.073	SE_exp	11.9266	Graphs			Yes	Unclear	Unclear	Unclear
Martina Di Bartolomeo	2023	2		Rat	Wildtype	Male		THC	2.5-5-10		P29-38	5	1	i.p.	Vehicle			Memory Discrimination	Novel object	long-term	1	8	10	Yes	Mean_veh	0.2252	SE_veh	0.0632	Mean_exp	0.0062	SE_exp	0.0786	Graphs			Yes	Unclear	Unclear	Unclear
Martina Di Bartolomeo	2023	3		Rat	Wildtype	Male		THC	2.5-5-10		P29-38	5	1	i.p.	Vehicle			Open Field	Novelty-induced	long-term	1	10	9	No(specify)	Mean_veh	139.6	SE_veh	17.6742	Mean_exp	145.492	SE_exp	16.3934	Graphs			Yes	Unclear	Unclear	Unclear
Martina Di Bartolomeo	2023	4		Rat	Wildtype	Male		THC	2.5-5-10		P29-38	5	1	i.p.	Vehicle			Memory Discrimination	Novel object	long-term	1	8	9	Yes	Mean_veh	0.2289	SE_veh	0.0601	Mean_exp	0.0042	SE_exp	0.0876	Graphs			Yes	Unclear	Unclear	Unclear
Cristina Izquierdo-Luengo	2023	1		Mouse	Wildtype	Male		JWH-018	0.5-1-1.5		P35-49	5	1	i.p.	Vehicle			Prepulse Inhibition		short-term	1	10	16	Yes	Mean_veh	19.0698	SE_veh	3.37692	Mean_exp	8.1395	SE_exp	2.7907	Graphs			Yes	Unclear	Unclear	Unclear
Cristina Izquierdo-Luengo	2023	2		Mouse	Wildtype	Male		JWH-018	0.5-1-1.5		P35-49	5	1	i.p.	Vehicle			Open Field	Novelty-induced	short-term	1	15	15	No(specify)	Mean_veh	1575.76	SE_veh	54.5454	Mean_exp	1515.15	SE_exp	36.3637	Graphs		beam breaks	Yes	Unclear	Unclear	Unclear
Cristina Izquierdo-Luengo	2023	3		Mouse	Wildtype	Male		JWH-018	0.5-1-1.5		P35-49	5	1	i.p.	Vehicle			Prepulse Inhibition		long-term	1	17	11	Yes	Mean_veh	13.7367	SE_veh	3.5231	Mean_exp	2.0996	SE_exp	2.4556	Graphs			Yes	Unclear	Unclear	Unclear
Cristina Izquierdo-Luengo	2023	4		Mouse	Wildtype	Male		JWH-018	0.5-1-1.5		P35-49	5	1	i.p.	Vehicle			Open Field	Novelty-induced	long-term	1	15	16	No(specify)	Mean_veh	1607.05	SE_veh	45.1128	Mean_exp	1607.05	SE_exp	40.0103	Graphs		beam breaks	Yes	Unclear	Unclear	Unclear
Cristina Izquierdo-Luengo	2023	5		Mouse	Wildtype	Female		JWH-018	0.5-1-1.5		P35-49	5	1	i.p.	Vehicle			Prepulse Inhibition		short-term	1	12	11	Yes	Mean_veh	7.6444	SE_veh	4	Mean_exp	7.4667	SE_exp	2.4444	Graphs			Yes	Unclear	Unclear	Unclear
Cristina Izquierdo-Luengo	2023	6		Mouse	Wildtype	Female		JWH-018	0.5-1-1.5		P35-49	5	1	i.p.	Vehicle			Open Field	Novelty-induced	short-term	1	10	11	No(specify)	Mean_veh	1601.74	SE_veh	34.8837	Mean_exp	1590.12	SE_exp	40.6977	Graphs		beam breaks	Yes	Unclear	Unclear	Unclear
Cristina Izquierdo-Luengo	2023	7		Mouse	Wildtype	Female		JWH-018	0.5-1-1.5		P35-49	5	1	i.p.	Vehicle			Prepulse Inhibition		long-term	1	17	18	Yes	Mean_veh	10.2721	SE_veh	3.4014	Mean_exp	10.1361	SE_exp	2.721	Graphs			Yes	Unclear	Unclear	Unclear
Cristina Izquierdo-Luengo	2023	8		Mouse	Wildtype	Female		JWH-018	0.5-1-1.5		P35-49	5	1	i.p.	Vehicle			Open Field	Novelty-induced	long-term	1	15	13	No(specify)	Mean_veh	1640.06	SE_veh	26.1248	Mean_exp	1576.2	SE_exp	29.0276	Graphs		beam breaks	Yes	Unclear	Unclear	Unclear
Sarah Beggiato	2022	1		Rat	Wildtype	Male		THC	2.5-5-10		P35-45	5	2	i.p.	Vehicle			Memory Alternation	Y maze	long-term	1	5	5	Yes	Mean_veh	54.755	SE_veh	4.0346	Mean_exp	42.9971	SE_exp	4.0346	Graphs			Yes	Unclear	yes	Unclear
De Felice et al.	2022	1		Rat	Wildtype	Male		THC	2.5-5-10		P35-45	5	2	i.p.	Vehicle			Open Field		long-term	1	16	16	Yes	Mean_veh	1027.03	SE_veh	96.52	Mean_exp	1059.85	SE_exp	102.31	Graphs		first 5 min	Unclear	Unclear	Unclear	Unclear
De Felice et al.	2022	2		Rat	Wildtype	Male		THC	2.5-5-10		P35-45	5	2	i.p.	Vehicle			Memory Discrimination	Novel object location	long-term	1	16	16	Yes	Mean_veh	54.9593	SE_veh	3.4147	Mean_exp	49.2683	SE_exp	3.4146	Graphs		1hr ITI	Unclear	Unclear	Unclear	Unclear
Guma et al.	2022	1		Mouse	Wildtype	Male		THC	5		P28-45	4	1	i.p.	Vehicle			Open Field	Novelty-induced	long-term	1	10	10	Yes	Mean_veh	5471.8	SE_veh	153.021	Mean_exp	5442.88	SE_exp	179.923	supplementary table			Unclear	Unclear	Unclear	Unclear
Guma et al.	2022	2		Mouse	Wildtype	Male		THC	5		P28-45	4	1	i.p.	Vehicle			Social Interaction	Social preference	long-term	1	10	10	Yes	Mean_veh	0.1631	SE_veh	0.112719	Mean_exp	0.181954	SE_exp	0.0750734	supplementary table			Unclear	Unclear	Unclear	Unclear
Guma et al.	2022	3		Mouse	Wildtype	Male		THC	5		P28-45	4	1	i.p.	Vehicle			Social Interaction	Social motivation	long-term	1	10	10	Yes	Mean_veh	0.152748	SE_veh	0.059944	Mean_exp	0.135695	SE_exp	0.0726199	supplementary table			Unclear	Unclear	Unclear	Unclear
Guma et al.	2022	4		Mouse	Wildtype	Female		THC	5		P28-45	4	1	i.p.	Vehicle			Open Field	Novelty-induced	long-term	1	9	9	Yes	Mean_veh	5531.05	SE_veh	159.279	Mean_exp	5457.5	SE_exp	180.73	supplementary table			Unclear	Unclear	Unclear	Unclear
Guma et al.	2022	5		Mouse	Wildtype	Female		THC	5		P28-45	4	1	i.p.	Vehicle			Social Interaction	Social preference	long-term	1	7	9	Yes	Mean_veh	-0.100851	SE_veh	0.0805042	Mean_exp	0.147301	SE_exp	0.0508371	supplementary table			Unclear	Unclear	Unclear	Unclear
Guma et al.	2022	6		Mouse	Wildtype	Female		THC	5		P28-45	4	1	i.p.	Vehicle			Social Interaction	Social motivation	long-term	1	9	9	Yes	Mean_veh	0.00712025	SE_veh	0.0727828	Mean_exp	-0.00141389	SE_exp	0.0642863	supplementary table			Unclear	Unclear	Unclear	Unclear
Farinha-Ferreira et al	2022	1		Rat	Wildtype	Female		HU-210	25-50-100 µg/kg		P35-45	5	2	i.p.	Vehicle			Open Field	Novelty-induced	long-term	1	10	10	Yes	t	0.91	df	18								Yes	Unclear	yes	No
Farinha-Ferreira et al	2022	2		Rat	Wildtype	Female		HU-210	25-50-100 µg/kg		P35-45	5	2	i.p.	Vehicle			Open Field	Novelty-induced	short-term	1	10	9	Yes	t	2	df	17					Text			Yes	Unclear	yes	No
Farinha-Ferreira et al	2022	3		Rat	Wildtype	Female		HU-210	25-50-100 µg/kg		P35-45	5	2	i.p.	Vehicle			Sucrose Preference		long-term	1	10	10	Yes	Mean_veh	89.0084	SE_veh	2.031	Mean_exp	87.4552	SE_exp	2.3895	Graphs			Yes	Unclear	yes	No
Farinha-Ferreira et al	2022	4		Rat	Wildtype	Female		HU-210	25-50-100 µg/kg		P35-45	5	2	i.p.	Vehicle			Sucrose Preference		short-term	1	9	10	Yes	Mean_veh	84.8901	SE_veh	87.5458	Mean_exp	59.3407	SE_exp	7.14165	Graphs			Yes	Unclear	yes	No
Farinha-Ferreira et al	2022	5		Rat	Wildtype	Female		HU-210	25-50-100 µg/kg		P35-45	5	2	i.p.	Vehicle			Sucrose Preference		short-term	1	8	8	Yes	Mean_veh	87.9167	SE_veh	1.6666	Mean_exp	76.6667	SE_exp	2.7083	Graphs			Yes	Unclear	yes	No
Zuo et al.	2022	1		Mouse	Wildtype	Male		THC	10	High	P29-48	5	1	i.p.	Vehicle			Social Interaction	Social preference	long-term	1	11	12	No(specify)	Mean_veh	66.2162	SE_veh	2.6349	Mean_exp	58.1081	SE_exp	4.223	Graphs		investigation ratio, not index	Unclear	Unclear	Unclear	yes
Zuo et al.	2022	2		Mouse	Wildtype	Female		THC	10	High	P29-48	5	1	i.p.	Vehicle			Social Interaction	Social preference	long-term	1	12	10	No(specify)	Mean_veh	62.5	SE_veh	3.0405	Mean_exp	52.3649	SE_exp	3.0405	Graphs		investigation ratio, not index	Unclear	Unclear	Unclear	yes
Sestan-Pesa	2023	1		Mouse	Wildtype	both		THC	10	High	P42-55	6	1	inhaled	Vehicle			Open Field	Novelty-induced	long-term	1	19	18	Yes	Mean_veh	10.5298	SE_veh	1.3907	Mean_exp	12.0198	SE_exp	1.4405	Graphs			Unclear	Unclear	Unclear	No
Sestan-Pesa	2023	2		Mouse	GHSR −/−	btoh		THC	10	High	P42-55	6	1	inhaled	Vehicle			Open Field	Novelty-induced	long-term	1	19	18	Yes	Mean_veh	10.7285	SE_veh	1.3907	Mean_exp	10.7285	SE_exp	1.3907	Graphs			Unclear	Unclear	Unclear	No
Manduca et al.	2024	1		Rat	Fmr1-Δexon 8	Male		CBD	10		P19-39	3	1	i.p.	Vehicle			Memory Discrimination	Novel object	short-term	1	10	10	Yes	Mean_veh	42	SE_veh	7.3333	Mean_exp	23.3333	SE_exp	10	Graphs			Yes	Unclear	Unclear	Unclear
Manduca et al.	2024	2		Rat	Wildtype	Male		CBD	10		P19-39	3	1	i.p.	Vehicle			Memory Discrimination	Novel object	short-term	1	10	10	Yes	Mean_veh	9.3333	SE_veh	8	Mean_exp	51.3333	SE_exp	4	Graphs			Yes	Unclear	Unclear	Unclear
Manduca et al.	2024	3		Rat	Fmr1-Δexon 8	Male		CBD	10		P19-39	3	1	i.p.	Vehicle			Open Field	Novelty-induced	short-term	1	10	10	No(specify)	Mean_veh	59.0498	SE_veh	5.4298	Mean_exp	72.2851	SE_exp	9.1629	Graphs		line crossing	Yes	Unclear	Unclear	Unclear
Manduca et al.	2024	4		Rat	Wildtype	Male		CBD	10		P19-39	3	1	i.p.	Vehicle			Open Field	Novelty-induced	short-term	1	10	10	No(specify)	Mean_veh	82.1267	SE_veh	7.4661	Mean_exp	82.1267	SE_exp	6.7873	Graphs		line crossing	Yes	Unclear	Unclear	Unclear
Lee et al.	2023	1		Mouse	Wildtype	Male		THC	5	Middle	P30-43	5	1	i.p.	Vehicle			Open Field	Novelty-induced	long-term	1	8	8	Yes	Mean_veh	47.2836	SE_veh	2.8657	Mean_exp	48.7164	SE_exp	3.1045	Graphs			Unclear	Unclear	Unclear	No
Lee et al.	2023	2		Mouse	Wildtype	Female		THC	5	Middle	P30-43	5	1	i.p.	Vehicle			Open Field	Novelty-induced	long-term	1	8	7	Yes	Mean_veh	61.148	SE_veh	2.417	Mean_exp	64.5317	SE_exp	2.1752	Graphs			Unclear	Unclear	Unclear	No

## Sheet: explanation
Study Information				Animal information				Intervention										Social interaction test
Author	Year of Publication	Entry No.		Species	Genotype	Sex		Substance Used	Dose (mg/kg)	Dose range (forTHC )	Duration	Starting week	Frequency (per day)	Route	Control	Note		Test Type	test subtype (if applicable)	Effect type by time	N_Exp group	N_exp sample size	N_con sample size	Primary measure?	Data item1	Value	Data item2	Value	Data source	Missing data	Note
First author with hyperlink		How many rows this paper has taken (each row includes only one experiment group from one test)			wildtype or specify the genotype (eg. Nrg1 KO)			specify the substance(s) used for this particular experiment		Low - 2.5 mg/kg Mid - 2.5-5 mg/kg High - 5-10 mg/kg Very high > 10 mg/kg Escalating dose- e.g. 2-5-10mg/kg	specify starting - end date	the week that starting date falls into			specify the treatment in control group					Short-term - 24hr -10d after the last exposure Long-term- after an abstinence of at least 10d	How many experiment groups there are	number of animals in experiment group	number of animals in control group	Did behavioual test measure the primary outcome (see following)?						if available data is not sufficient to calculate effect size and standard error (need to check if sufficient)
each row contains data from one experiment from one behavioural test, one paper can take up multiple rows if it reported multiple behavioural tests empty rows indicate data unavailablefrom the selected study.																								Locomotion (novelty- or amphetamine-induced, assessed in an open field): distance travelled (unit: mm or cm, continuous data) Social interaction tasks (Sociability/ Social no velty preference): discrimination index (continuous data) (discrimination index = [time exploring novel − time exploring familiar]/[time exploring novel + time exploring familiar]) Anhedonia (Sucrose preference test): sucros…
																								Alternation percentage= number of alternation / (total number of entries − 2) × 100 sucrose preference score= (sucrose solution intake / total intake) × 100.
																								Investigation ratio (IR = time spent investigating novel object/ time spent investigating both objects)

## Sheet: Lists
Substance used		Test types		Alternation	Discrimination	Social interaction	Open Field		Memory Morris Water Maze	Fear Conditioning	Barnes Maze
		Open Field		Y maze	Novel object	Social preference	Novelty-induced		Learning	Learning	Learning
		Sucrose Preference		T maze	Novel object location	Social motivation	Psychostimulant-induced		Memory	Memory	Memory
		Memory Alternation		Radial arm maze	Novel odour
		Memory Discrimination			Novel texture
		Morris Water
		Barnes Maze
		Fear Conditioning
		Prepulse Inhibition
		Set Shifting
		Social Interaction
